# Supplementary material for: Defining the proteolytic landscape during enterovirus infection
Source: PLoS Pathog. 2020 Sep 30;16(9):e1008927. doi: 10.1371/journal.ppat.1008927 (PMC7549765; doi:10.1371/journal.ppat.1008927)
Supplement: S2 File — Instructions to read the data are provided in the “Read me” sheet of the excel file. (XLSX) [file ppat.1008927.s015.xlsx]

## Sheet: Read me
Column	Column title	Description
A	Gene name	Name of the enriched genes
B	Protein accession	The NCBI accession number of the corresponding proteins
C	Description	Gene description
D	Peptide sequence	The sequence of the identified peptides. The P1 amino acid is shown in square brackets
E	Peptide length	Length of the identified peptides
F	Modifications	Modifications detected on the identified peptides
G	PSM	Peptide-spectral matches (the number of times the given peptide was identified)
H	Positive replicates	Out of the 15 total virus-infected replicates at the second last time point, how many contained the given peptide
I	Positive viruses	Out of the 5 viruses tested, how many contained the given peptide in at least one replicate
J	CVB	Out of the 3 CVB replicates (4h post-infection), how many contained the given peptide
K	Polio	Out of the 3 PV replicates (4h post-infection), how many contained the given peptide
L	HRV	Out of the 3 HRV replicates (9h post-infection), how many contained the given peptide
M	EV70	Out of the 3 EV70 replicates (6h post-infection), how many contained the given peptide
N	EV71	Out of the 3 EV71 replicates (6h post-infection), how many contained the given peptide
O	CVB_1	Peptide abundance in CVB_4h_replicate 1
P	CVB_2	Peptide abundance in CVB_4h_replicate 2
Q	CVB_3	Peptide abundance in CVB_4h_replicate 3
R	PV_1	Peptide abundance in PV_4h_replicate 1
S	PV_2	Peptide abundance in PV_4h_replicate 2
T	PV_3	Peptide abundance in PV_4h_replicate 3
U	HRV_1	Peptide abundance in HRV_9h_replicate 1
V	HRV_2	Peptide abundance in HRV_9h_replicate 2
W	HRV_3	Peptide abundance in HRV_9h_replicate 3
X	EV70_1	Peptide abundance in EV70_6h_replicate 1
Y	EV70_2	Peptide abundance in EV70_6h_replicate 2
Z	EV70_3	Peptide abundance in EV70_6h_replicate 3
AA	EV71_1	Peptide abundance in EV71_6h_replicate 1
AB	EV71_2	Peptide abundance in EV71_6h_replicate 2
AC	EV71_3	Peptide abundance in EV71_6h_replicate 3

## Sheet: Peptides identified
Gene name	Protein accession	Description	Peptide sequence	Peptide length	Modifications	PSM	Positive replicates	Positive viruses	Positive replicates for each virus_second last time point					Abundance
									CVB	Polio	HRV	EV70	EV71	CVB_1	CVB_2	CVB_3	PV_1	PV_2	PV_3	HRV_1	HRV_2	HRV_3	EV70_1	EV70_2	EV70_3	EV71_1	EV71_2	EV71_3
CD2AP	Q9Y5K6	CD2-associated protein OS=Homo sapiens OX=9606 GN=CD2AP PE=1 SV=1	[Y]GLPAGGIQPHPQTK	14	1xAbu-alpha (N-term) [N-Term]	88	15	5	3	3	3	3	3	30.7403	30.174	30.1053	31.0885	30.9336	31.1652	30.927	31.3165	31.3852	28.5415	28.6176	28.0943	28.992	28.918	29.045
PRRC2B	Q5JSZ5	Protein PRRC2B OS=Homo sapiens OX=9606 GN=PRRC2B PE=1 SV=2	[K]GYPLPHPK	8	1xAbu-alpha (N-term) [N-Term]	45	15	5	3	3	3	3	3	26.2668	25.8169	25.636	25.0959	25.2462	25.1337	26.2494	26.304	26.5226	25.8533	25.8858	25.391	24.1583	24.0409	24.4384
TMCO4	A0A075B6H3	Transmembrane and coiled-coil domain-containing protein 4 OS=Homo sapiens OX=9606 GN=TMCO4 PE=1 SV=1	[R]QAAAAASSALESGCPSGGPEGSLGPEAP	28	1xAbu-alpha (N-term) [N-Term];1xCarbamidomethyl [C14]	114	15	5	3	3	3	3	3	26.5036	26.0511	26.2946	28.1975	28.2326	28.7624	27.5991	28.3517	28.9883	28.3474	28.5962	28.0074	26.4569	26.376	26.193
PRPF3	O43395	U4/U6 small nuclear ribonucleoprotein Prp3 OS=Homo sapiens OX=9606 GN=PRPF3 PE=1 SV=2	[M]GIAPPKVELK	10	1xAbu-alpha (N-term) [N-Term]	55	15	5	3	3	3	3	3	24.6117	24.2683	24.082	25.2859	25.1157	25.2909	28.3024	28.5611	27.875	28.1043	28.3132	27.5957	22.8456	22.9359	22.9085
DDX20	Q9UHI6	Probable ATP-dependent RNA helicase DDX20 OS=Homo sapiens OX=9606 GN=DDX20 PE=1 SV=2	[Y]GIASVPNQPLKK	12	1xAbu-alpha (N-term) [N-Term]	50	15	5	3	3	3	3	3	26.1751	25.6091	25.0645	27.7999	27.6022	27.8021	28.9561	29.1751	29.2752	26.8112	26.8317	26.1583	27.9204	27.6147	27.8421
PCBP2	F8VZX2;Q15366	Poly(rC)-binding protein 2 OS=Homo sapiens OX=9606 GN=PCBP2 PE=1 SV=1;Poly(rC)-binding protein 2 OS=Homo sapiens OX=9606 GN=PCBP2 PE=1 SV=1	[Q]SHFPMTHGNTGFSGIESSSPEVK	23	1xAbu-alpha (N-term) [N-Term]	66	14	5	2	3	3	3	3	26.4647	26.2719	26.2828	26.9333	26.8125	26.9962	23.8153	24.538	23.3166	28.2915	28.353	27.767	23.2695	26.6825	23.1709
SRPK2	P78362	SRSF protein kinase 2 OS=Homo sapiens OX=9606 GN=SRPK2 PE=1 SV=3	[T]GLEEAAEAETAK	12	1xAbu-alpha (N-term) [N-Term]	31	14	5	3	2	3	3	3	26.6067	26.1559	26.3998	22.0499	22.0161	22.9814	25.3682	25.5628	25.9532	25.7154	25.8472	25.2805	25.6861	26.1601	25.8
CBX8	Q9HC52	Chromobox protein homolog 8 OS=Homo sapiens OX=9606 GN=CBX8 PE=1 SV=3	[M]GLSPPASSTSTSSTCR	16	1xAbu-alpha (N-term) [N-Term];1xCarbamidomethyl [C15]	67	14	5	3	2	3	3	3	26.9586	26.5626	26.545	21.3419	21.5971	21.8837	27.3802	27.6917	28.0001	26.5281	26.6714	26.3407	27.388	27.2941	27.3984
PABPC3	Q9H361;P11940	Polyadenylate-binding protein 3 OS=Homo sapiens OX=9606 GN=PABPC3 PE=1 SV=2;Polyadenylate-binding protein 1 OS=Homo sapiens OX=9606 GN=PABPC1 PE=1 SV=2	[AP]AAAAAAATPAVR	12	1xAbu-alpha (N-term) [N-Term]	97	14	5	3	2	3	3	3	29.3183	28.5233	28.645	26.211	26.1679	26.3592	28.6759	28.7965	28.6993	28.346	28.386	27.9469	31.1317	31.1062	31.2177
HNRNPM	M0QZM1;P52272	Heterogeneous nuclear ribonucleoprotein M (Fragment) OS=Homo sapiens OX=9606 GN=HNRNPM PE=1 SV=1;Heterogeneous nuclear ribonucleoprotein M OS=Homo sapiens OX=9606 GN=HNRNPM PE=1 SV=3	[G]GGGSVPGIER	10	1xAbu-alpha (N-term) [N-Term]	31	14	5	3	3	3	2	3	23.1608	23.0352	22.922	24.051	23.7728	24.1668	25.227	25.0992	25.7751	26.8826	26.9553	19.3799	25.1678	25.1814	25.2555
PTBP1	A0A0U1RRM4	Polypyrimidine tract-binding protein 1 OS=Homo sapiens OX=9606 GN=PTBP1 PE=1 SV=1	[Q]AAGLSVPNVHGALAPLAIPSAAAAAAAAGR	30	1xAbu-alpha (N-term) [N-Term]	117	14	5	3	3	3	3	2	28.607	28.2541	27.6634	32.3725	31.768	32.4891	25.2484	25.4834	25.1141	30.4506	30.4509	30.4759	25.9044	25.7731	25.8436
EIF4G2	P78344	Eukaryotic translation initiation factor 4 gamma 2 OS=Homo sapiens OX=9606 GN=EIF4G2 PE=1 SV=1	[Q]GLSQLYHNQSQGLLSQLQGQSK	22	1xAbu-alpha (N-term) [N-Term]	26	13	5	2	3	2	3	3	27.9545	27.3272	26.2307	22.2393	21.9455	23.014	25.2094	25.3096	25.284	22.632	23.2455	22.9901	25.7651	25.5882	25.6401
CTTNBP2NL	Q9P2B4	CTTNBP2 N-terminal-like protein OS=Homo sapiens OX=9606 GN=CTTNBP2NL PE=1 SV=2	[T]GLPGPATPAYSYAK	14	1xAbu-alpha (N-term) [N-Term]	38	13	5	3	2	3	2	3	29.5348	28.8281	29.1116	23.7746	24.5524	24.5573	29.5453	29.3766	29.4451	23.8173	24.0763	23.341	28.4024	28.3521	28.3553
ZNF106	Q9H2Y7	Zinc finger protein 106 OS=Homo sapiens OX=9606 GN=ZNF106 PE=1 SV=1	[T]GIQEPQTDETR	11	1xAbu-alpha (N-term) [N-Term]	32	13	5	3	2	3	2	3	27.1132	26.5225	26.4701	25.394	25.3629	25.5909	26.2806	26.8573	26.8894	25.4677	25.5222	25.0413	25.8622	25.9801	26.0043
KIAA1522	Q9P206	Uncharacterized protein KIAA1522 OS=Homo sapiens OX=9606 GN=KIAA1522 PE=1 SV=2	[V]GAPGGAPTPALGPSAPQKPLRR	22	1xAbu-alpha (N-term) [N-Term]	39	13	5	3	3	3	2	2	26.22	25.7464	25.6892	24.1681	24.1843	24.5799	26.8337	27.7964	27.7823	21.7372	22.5514	NaN	24.6906	24.2035	24.4639
COPRS	J3QRX9	Coordinator of PRMT5 and differentiation stimulator OS=Homo sapiens OX=9606 GN=COPRS PE=1 SV=1	[Q]GAAEPSRGPPLPSAR	15	1xAbu-alpha (N-term) [N-Term]	48	13	5	3	3	3	3	1	24.3869	23.3185	24.2126	25.1041	25.0788	25.2972	26.4187	26.8542	26.9504	27.2116	27.3045	26.7815	25.5588	25.4495	25.7232
CDC5L	Q99459	Cell division cycle 5-like protein OS=Homo sapiens OX=9606 GN=CDC5L PE=1 SV=2	[S]GVSEFTK	7	1xAbu-alpha (N-term) [N-Term]	37	12	5	1	2	3	3	3	25.2462	24.7002	24.7897	24.7313	24.5035	24.5835	29.3228	29.3007	29.523	27.2463	27.2536	26.9296	22.465	21.9447	22.5511
SMARCC1	Q92922	SWI/SNF complex subunit SMARCC1 OS=Homo sapiens OX=9606 GN=SMARCC1 PE=1 SV=3	[F]GLRTDIYSKK	10	1xAbu-alpha (N-term) [N-Term]	43	12	5	3	2	1	3	3	27.7819	26.9592	26.3522	25.1224	24.9201	25.5422	27.5834	28.1198	27.4445	23.5372	23.519	21.7805	22.939	22.8143	23.0044
SMARCC1	Q92922	SWI/SNF complex subunit SMARCC1 OS=Homo sapiens OX=9606 GN=SMARCC1 PE=1 SV=3	[F]GLRTDIYSK	9	1xAbu-alpha (N-term) [N-Term]	41	12	5	3	2	3	1	3	28.4272	27.6317	26.9278	25.9809	25.9303	26.1628	28.6969	28.9605	28.9606	22.2364	21.6604	20.9303	20.9688	21.4752	21.2363
RBM14	Q96PK6	RNA-binding protein 14 OS=Homo sapiens OX=9606 GN=RBM14 PE=1 SV=2	[Y]GAQGSSLASYGNQPSSYGAQAASSYGVR	28	1xAbu-alpha (N-term) [N-Term]	25	12	5	3	3	1	3	2	25.2151	24.7203	24.8481	26.1059	26.0779	26.3402	24.0696	24.5826	24.1964	24.2434	24.366	24.2928	22.8496	24.0661	23.9374
NEDD1	Q8NHV4	Protein NEDD1 OS=Homo sapiens OX=9606 GN=NEDD1 PE=1 SV=1	[S]GAESGNLNTSPSSNQTR	17	1xAbu-alpha (N-term) [N-Term]	36	12	5	3	3	2	2	2	24.2407	23.2773	23.4419	23.1674	23.2968	23.7627	23.9867	24.2947	24.5414	21.8084	22.3005	21.3684	19.6975	19.6001	19.3347
IST1	P53990	IST1 homolog OS=Homo sapiens OX=9606 GN=IST1 PE=1 SV=1	[Q]AFPNIHPPQIPATPPSYESVDDINADK	27	1xAbu-alpha (N-term) [N-Term]	56	12	5	2	3	3	3	1	24.8057	25.2314	23.6598	25.0342	25.5071	24.0346	28.6911	28.9837	28.8703	27.1327	27.3728	27.1741	22.8773	23.569	23.3062
FAM120A	Q9NZB2	Constitutive coactivator of PPAR-gamma-like protein 1 OS=Homo sapiens OX=9606 GN=FAM120A PE=1 SV=2	[Q]GRPPYAASAEEVAK	14	1xAbu-alpha (N-term) [N-Term]	28	12	5	2	3	3	3	1	25.8262	25.2678	25.3634	23.422	24.41	24.5863	24.6722	25.1692	25.3148	25.3599	25.4036	25.0014	24.7141	24.6031	24.823
TMEM184C	Q9NVA4	Transmembrane protein 184C OS=Homo sapiens OX=9606 GN=TMEM184C PE=1 SV=2	[Q]GFGHTVTPQTTPTTAK	16	1xAbu-alpha (N-term) [N-Term]	28	11	4	2	0	3	3	3	26.538	25.9334	26.0718	25.4123	25.5157	25.7695	26.4391	26.8533	27.014	26.7179	26.7751	26.2748	25.6345	25.5612	25.8014
CBX8	Q9HC52	Chromobox protein homolog 8 OS=Homo sapiens OX=9606 GN=CBX8 PE=1 SV=3	[C]GVTSPSSAEATGK	13	1xAbu-alpha (N-term) [N-Term]	27	11	4	2	0	3	3	3	25.6684	25.2724	25.1696	21.0803	20.9304	20.935	25.2817	25.3746	25.5347	25.5905	25.6554	25.4984	23.8883	23.9383	23.8176
DBNL	Q9UJU6	Drebrin-like protein OS=Homo sapiens OX=9606 GN=DBNL PE=1 SV=1	[Q]GAGSEHIDHHIQGQGLSGQGLCAR	24	1xAbu-alpha (N-term) [N-Term];1xCarbamidomethyl [C22]	38	11	5	1	2	2	3	3	27.5559	27.4613	26.3254	22.4036	22.4162	22.8312	24.5873	26.1472	25.8944	25.2219	25.0836	24.5372	26.4157	26.2823	26.4147
PCBP1	Q15365	Poly(rC)-binding protein 1 OS=Homo sapiens OX=9606 GN=PCBP1 PE=1 SV=2	[H]GGTGFAGIDSSSPEVK	16	1xAbu-alpha (N-term) [N-Term]	31	11	4	3	2	0	3	3	22.5915	22.3337	21.6336	22.6997	22.6888	22.5208	19.7696	21.294	NaN	26.8011	26.7728	26.3425	25.6252	25.4976	25.4445
CSTF2T	Q9H0L4	Cleavage stimulation factor subunit 2 tau variant OS=Homo sapiens OX=9606 GN=CSTF2T PE=1 SV=1	[Q]GGGIQGGGIQGASK	14	1xAbu-alpha (N-term) [N-Term]	28	11	4	3	0	3	2	3	23.6613	23.7966	23.3924	24.0815	24.0216	24.2639	24.7638	24.9317	24.7279	23.7352	23.886	23.6018	23.9204	23.7438	24.0339
C2CD2	Q9Y426	C2 domain-containing protein 2 OS=Homo sapiens OX=9606 GN=C2CD2 PE=1 SV=2	[Q]GYTASVDSTHQEDAPSHPER	20	1xAbu-alpha (N-term) [N-Term]	49	11	5	1	3	2	2	3	NaN	22.7842	NaN	24.7678	24.7435	25.5213	25.0281	26.1716	26.3087	27.1913	27.3984	26.8039	26.4104	26.2528	26.4393
TFAP4	Q01664	Transcription factor AP-4 OS=Homo sapiens OX=9606 GN=TFAP4 PE=1 SV=2	[S]SVINSVSTSR	10	1xAbu-alpha (N-term) [N-Term]	28	11	4	3	3	0	2	3	25.9884	25.2449	25.4896	25.6728	25.6393	25.7447	21.1969	20.6546	NaN	23.0908	22.8339	22.6834	24.3792	24.2511	24.509
MATR3	A8MXP9	Matrin-3 OS=Homo sapiens OX=9606 GN=MATR3 PE=1 SV=1	[L]GMSSSLNQQGAHSALSSASTSSHNLQSIFNIGSR	34	1xAbu-alpha (N-term) [N-Term]	45	11	5	2	3	2	1	3	31.1755	30.7413	30.463	29.8484	29.6279	30.0755	30.6209	30.8506	31.0703	27.9334	27.9914	27.9083	29.5563	29.2948	29.4125
PCBP1	Q15365	Poly(rC)-binding protein 1 OS=Homo sapiens OX=9606 GN=PCBP1 PE=1 SV=2	[F]AMMHGGTGFAGIDSSSPEVK	20	1xAbu-alpha (N-term) [N-Term]	29	11	5	3	1	2	3	2	25.0013	24.7428	23.9674	NaN	22.1693	22.1255	21.6359	22.6099	NaN	25.1898	25.4004	25.1852	23.2978	22.8427	23.1338
RBM14	Q96PK6	RNA-binding protein 14 OS=Homo sapiens OX=9606 GN=RBM14 PE=1 SV=2	[Y]GNQPSSYGAQAASSYGVR	18	1xAbu-alpha (N-term) [N-Term]	52	11	4	3	3	0	3	2	23.6063	22.3607	21.9325	26.1216	26.0621	26.2974	NaN	NaN	NaN	23.8484	24.0057	23.5502	23.5221	23.3908	23.2126
CSTF2	E7EWR4	Cleavage stimulation factor subunit 2 OS=Homo sapiens OX=9606 GN=CSTF2 PE=1 SV=1	[Q]GGSQPGGFSPGQNQVTPQDHEK	22	1xAbu-alpha (N-term) [N-Term]	33	11	5	3	1	3	2	2	26.5572	25.8948	25.9636	26.1442	26.1486	26.6361	24.9538	26.0606	26.2115	25.7083	25.8149	25.4041	25.6706	25.57	25.9125
CDC40	Q5SRN1	Pre-mRNA-processing factor 17 OS=Homo sapiens OX=9606 GN=CDC40 PE=1 SV=1	[Y]GYALDPSLDNHQVSAK	16	1xAbu-alpha (N-term) [N-Term]	39	11	5	3	3	1	2	2	26.8241	26.2135	26.422	27.3709	27.2987	27.4412	25.6978	26.1235	25.5628	24.254	24.3128	23.855	23.2716	22.6941	23.1782
CEP170B	Q9Y4F5	Centrosomal protein of 170 kDa protein B OS=Homo sapiens OX=9606 GN=CEP170B PE=1 SV=4	[Q]GLPVPGSPGGQK	12	1xAbu-alpha (N-term) [N-Term]	30	11	5	2	2	3	3	1	26.1407	25.5603	24.9273	27.0073	26.9012	27.0051	26.2878	26.2568	26.3404	24.0636	24.2365	23.6863	23.9066	23.7643	23.7015
ARHGAP12	Q1RLN5	ARHGAP12 protein OS=Homo sapiens OX=9606 GN=ARHGAP12 PE=1 SV=1	[F]GKPSSSVQGTGLIR	14	1xAbu-alpha (N-term) [N-Term]	33	11	5	3	2	2	3	1	25.2981	24.8794	24.9966	23.861	23.8284	24.1089	25.7074	26.0571	26.2863	23.2984	23.3413	22.6331	NaN	NaN	20.6489
UBQLN2	Q9UHD9	Ubiquilin-2 OS=Homo sapiens OX=9606 GN=UBQLN2 PE=1 SV=2	[Q]GSAAAPAEPK	10	1xAbu-alpha (N-term) [N-Term]	21	11	4	3	3	3	2	0	25.1182	24.4111	24.7199	22.5692	21.6987	21.2943	23.0999	23.5059	24.0614	20.3855	20.8965	19.4093	NaN	NaN	NaN
HNRNPM	M0QZM1;P52272	Heterogeneous nuclear ribonucleoprotein M (Fragment) OS=Homo sapiens OX=9606 GN=HNRNPM PE=1 SV=1;Heterogeneous nuclear ribonucleoprotein M OS=Homo sapiens OX=9606 GN=HNRNPM PE=1 SV=3	[A]GMGAGLER	8	1xAbu-alpha (N-term) [N-Term]	33	10	4	0	1	3	3	3	24.6674	25.404	22.7578	26.2717	26.2792	26.3168	25.074	23.9614	24.934	24.2096	24.2493	23.3883	24.6331	24.3971	24.4528
RBM12	Q9NTZ6	RNA-binding protein 12 OS=Homo sapiens OX=9606 GN=RBM12 PE=1 SV=1	[A]GLPGAGMPSAGIPSAGGEEHAFLTVGSK	28	1xAbu-alpha (N-term) [N-Term]	33	10	5	1	1	2	3	3	23.1356	23.0264	23.3466	23.0403	21.7984	23.5331	26.8399	26.9806	26.8765	27.5342	27.6435	27.7092	26.3551	26.2909	26.3431
LARP4	Q71RC2;F8VY40	La-related protein 4 OS=Homo sapiens OX=9606 GN=LARP4 PE=1 SV=3;La-related protein 4 (Fragment) OS=Homo sapiens OX=9606 GN=LARP4 PE=1 SV=1	[E]GNAELSEDICK	11	1xAbu-alpha (N-term) [N-Term];1xCarbamidomethyl [C10]	24	10	4	2	0	2	3	3	22.4868	22.3039	22.5097	NaN	18.5065	NaN	22.7915	23.1837	23.1865	21.8652	21.6419	19.247	24.9279	24.6041	24.9555
PABPC3	Q9H361;P11940	Polyadenylate-binding protein 3 OS=Homo sapiens OX=9606 GN=PABPC3 PE=1 SV=2;Polyadenylate-binding protein 1 OS=Homo sapiens OX=9606 GN=PABPC1 PE=1 SV=2	[A]AAAAAATPAVR	11	1xAbu-alpha (N-term) [N-Term]	31	10	4	3	0	1	3	3	24.1924	23.4188	23.3798	NaN	NaN	NaN	NaN	19.9149	21.1064	22.2943	22.4587	22.2518	25.3054	25.1936	25.3145
DDX20	Q9UHI6	Probable ATP-dependent RNA helicase DDX20 OS=Homo sapiens OX=9606 GN=DDX20 PE=1 SV=2	[Y]GIASVPNQPLK	11	1xAbu-alpha (N-term) [N-Term]	31	10	4	0	3	2	2	3	24.7256	24.194	23.6562	26.4942	26.3361	26.49	27.7249	27.66	26.9104	25.6923	25.7288	25.2298	26.6368	26.6514	26.5892
CSTF2T	Q9H0L4	Cleavage stimulation factor subunit 2 tau variant OS=Homo sapiens OX=9606 GN=CSTF2T PE=1 SV=1	[Q]GGSQPSSFSPGQSQVTPQDQEK	22	1xAbu-alpha (N-term) [N-Term]	23	10	5	3	1	1	2	3	24.5047	24.0847	23.9896	20.8712	22.099	21.9056	NaN	21.6917	21.3695	25.2857	25.488	25.1111	22.6751	21.5483	22.4995
RPRD2	Q5VT52	Regulation of nuclear pre-mRNA domain-containing protein 2 OS=Homo sapiens OX=9606 GN=RPRD2 PE=1 SV=1	[T]GVSPASRPSPGTPTSPSNLTSGLK	24	1xAbu-alpha (N-term) [N-Term]	30	10	4	2	0	3	3	2	28.4366	27.9567	27.7902	21.5767	21.5383	21.673	26.3213	27.0661	27.0174	23.5798	23.9701	23.706	27.4951	27.4119	27.4198
HNRNPK	P61978;Q5T6W2	Heterogeneous nuclear ribonucleoprotein K OS=Homo sapiens OX=9606 GN=HNRNPK PE=1 SV=1;Heterogeneous nuclear ribonucleoprotein K (Fragment) OS=Homo sapiens OX=9606 GN=HNRNPK PE=1 SV=1	[Q]GGSGYDYSYAGGR	13	1xAbu-alpha (N-term) [N-Term]	37	10	5	3	2	1	2	2	25.9004	25.27	25.4495	26.3163	26.1235	26.177	NaN	21.5823	22.0495	27.996	28.1075	27.7717	24.0596	22.547	24.0672
PABPC1	P11940	Polyadenylate-binding protein 1 OS=Homo sapiens OX=9606 GN=PABPC1 PE=1 SV=2	[M]GPRPAAAAAAATPAVR	16	1xAbu-alpha (N-term) [N-Term]	25	10	4	3	3	0	2	2	25.3778	24.8605	24.6947	23.6104	23.6023	23.7206	22.3182	22.3337	22.7128	22.9667	22.9906	22.5948	24.6094	24.526	24.7
RPRD2	Q5VT52	Regulation of nuclear pre-mRNA domain-containing protein 2 OS=Homo sapiens OX=9606 GN=RPRD2 PE=1 SV=1	[L]GSSAPSESHPSDFQR	15	1xAbu-alpha (N-term) [N-Term]	33	10	5	2	3	1	3	1	26.2845	25.8148	25.8671	25.7285	25.6796	26.1294	24.2919	24.4221	25.0072	23.7945	24.0255	23.4494	24.174	23.8215	24.1698
KIAA0100	K7EQ86	KIAA0100, isoform CRA_a OS=Homo sapiens OX=9606 GN=KIAA0100 PE=1 SV=1	[T]GIPVVKPR	8	1xAbu-alpha (N-term) [N-Term]	23	10	5	3	2	2	2	1	24.6877	24.3401	23.6665	24.4262	24.2779	24.413	25.5898	25.7106	25.8445	23.3449	23.5828	23.0204	23.6223	23.544	23.7595
PANX1	Q96RD7	Pannexin-1 OS=Homo sapiens OX=9606 GN=PANX1 PE=1 SV=4	[Q]GMNIDSETK	9	1xAbu-alpha (N-term) [N-Term]	29	10	4	2	2	3	3	0	NaN	20.889	NaN	26.7572	26.7387	26.8066	27.0584	27.3452	27.5368	25.1856	25.14	24.642	NaN	19.8318	20.1084
HNRNPD	D6RBQ9;Q14103	Heterogeneous nuclear ribonucleoprotein D0 (Fragment) OS=Homo sapiens OX=9606 GN=HNRNPD PE=1 SV=1;Heterogeneous nuclear ribonucleoprotein D0 OS=Homo sapiens OX=9606 GN=HNRNPD PE=1 SV=1	[Q]GAAAAAGSGAGTGGGTASGGTEGGSAESEGAKIDASK	37	1xAbu-alpha (N-term) [N-Term]	59	10	4	2	2	3	3	0	24.7137	24.0808	24.1923	25.9151	26.0393	26.7449	26.1799	27.1766	27.1138	26.2518	26.5097	26.1724	19.1424	19.2337	19.0798
EPB41	A0A2R8Y7Y3	Protein 4.1 OS=Homo sapiens OX=9606 GN=EPB41 PE=1 SV=1	[QX]GQVAEGGVLDASAK	14	1xAbu-alpha (N-term) [N-Term]	35	10	4	3	1	3	3	0	22.7155	22.3867	22.0829	19.7906	NaN	19.916	25.7773	25.8247	26.1441	25.3606	25.5207	25.0895	22.7538	22.659	22.9375
SCRIB	A0A0G2JPP5	Protein scribble homolog OS=Homo sapiens OX=9606 GN=SCRIB PE=1 SV=1	[Q]GMQPDGEGPVAPGGWHNGPHAPWAPR	26	1xAbu-alpha (N-term) [N-Term]	41	10	4	2	3	3	2	0	24.7562	23.0889	24.008	25.2038	27.4446	27.3996	27.1527	28.1592	28.0173	24.553	24.5349	24.6373	24.0871	24.0667	23.8356
QRICH1	Q2TAL8	Glutamine-rich protein 1 OS=Homo sapiens OX=9606 GN=QRICH1 PE=1 SV=1	[V]GALSPPPSQQGSPR	14	1xAbu-alpha (N-term) [N-Term]	28	9	4	0	1	3	2	3	23.0744	23.7357	23.631	24.077	24.4071	24.7319	25.492	25.7214	26.3058	23.513	23.6172	22.9675	25.0796	24.9009	25.2094
PCBP2	F8VZX2;Q15366	Poly(rC)-binding protein 2 OS=Homo sapiens OX=9606 GN=PCBP2 PE=1 SV=1;Poly(rC)-binding protein 2 OS=Homo sapiens OX=9606 GN=PCBP2 PE=1 SV=1	[T]GFSGIESSSPEVK	13	1xAbu-alpha (N-term) [N-Term]	67	9	5	1	1	2	2	3	NaN	23.8001	NaN	29.1191	29.1469	29.3097	27.6433	27.5587	28.3172	25.8493	26.4043	26.1167	32.5266	32.3389	32.4646
RBM14	Q96PK6	RNA-binding protein 14 OS=Homo sapiens OX=9606 GN=RBM14 PE=1 SV=2	[Y]GGQAAAASSLNSYGAQGSSLASYGNQPSSYGAQAASSYGVR	41	1xAbu-alpha (N-term) [N-Term]	20	9	5	1	2	1	2	3	24.9492	24.343	24.6273	24.8419	25.2685	25.1409	23.4316	24.4872	23.4698	23.5289	23.4106	23.4326	23.5931	23.6162	23.9423
MAP4	P27816;E7EVA0	Microtubule-associated protein 4 OS=Homo sapiens OX=9606 GN=MAP4 PE=1 SV=3;Microtubule-associated protein OS=Homo sapiens OX=9606 GN=MAP4 PE=1 SV=1	[Q]GWSVEALNSPHSESFVSPEAVAEPPQPTAVPLELAK	36	1xAbu-alpha (N-term) [N-Term]	28	9	5	1	1	2	3	2	26.1313	25.5738	25.4488	27.3168	27.2467	27.5561	25.7372	25.7249	25.7078	27.2228	27.8841	27.3445	24.3497	23.7929	24.2772
ARID4B	H0Y7Y8	AT-rich interactive domain-containing protein 4B (Fragment) OS=Homo sapiens OX=9606 GN=ARID4B PE=1 SV=2	[T]GFYSGFSEVAEK	12	1xAbu-alpha (N-term) [N-Term]	23	9	4	2	2	0	3	2	26.6246	26.2698	25.1234	25.4722	25.4749	25.4215	25.0036	25.7215	24.7801	23.1906	23.4716	NaN	23.412	24.2411	23.4671
PCBP1	Q15365	Poly(rC)-binding protein 1 OS=Homo sapiens OX=9606 GN=PCBP1 PE=1 SV=2	[Q]SHFAMMHGGTGFAGIDSSSPEVK	23	1xAbu-alpha (N-term) [N-Term]	30	9	4	3	1	0	3	2	23.9171	22.7676	23.036	23.6734	23.5143	23.4616	22.0361	22.1914	20.7049	25.5609	25.6054	25.4619	23.7262	23.3209	23.8255
TCF7L2	Q5JRY4	Transcription factor 7-like 2 (Fragment) OS=Homo sapiens OX=9606 GN=TCF7L2 PE=1 SV=2	[T]GIPHPAIVTPTVK	13	1xAbu-alpha (N-term) [N-Term]	39	9	4	3	0	2	2	2	27.244	26.8419	26.8033	NaN	NaN	NaN	27.8144	27.6126	27.426	NaN	NaN	NaN	NaN	21.6781	NaN
CITED2	Q99967	Cbp/p300-interacting transactivator 2 OS=Homo sapiens OX=9606 GN=CITED2 PE=1 SV=2	[Q]GGSLPASMQLQK	12	1xAbu-alpha (N-term) [N-Term]	17	9	4	3	2	0	2	2	22.8631	21.9411	22.8563	24.8665	24.8474	24.8886	20.4522	20.8553	20.9065	24.87	25.1215	24.6404	25.1011	23.9371	25.0121
TNRC6B	H0Y720	Trinucleotide repeat-containing gene 6B protein (Fragment) OS=Homo sapiens OX=9606 GN=TNRC6B PE=1 SV=1	[M]GLLSQTEDNPSSK	13	1xAbu-alpha (N-term) [N-Term]	32	9	4	0	3	3	1	2	25.9844	25.5707	25.5661	24.8347	24.589	24.9684	27.0838	27.2377	27.3243	NaN	NaN	NaN	24.5251	24.4664	24.5519
MATR3	A8MXP9	Matrin-3 OS=Homo sapiens OX=9606 GN=MATR3 PE=1 SV=1	[L]GMSSSLNQQGAHSALSSASTSSHNLQSIFNIGSR	34	1xAbu-alpha (N-term) [N-Term];1xOxidation [M2]	42	9	5	3	1	2	1	2	29.0731	27.5728	27.9155	26.2677	26.5722	26.7863	27.4472	27.2359	26.6057	25.7017	26.0605	25.8087	27.2118	26.7471	27.1516
RBM12B	B9ZVT1	RNA-binding protein 12B OS=Homo sapiens OX=9606 GN=RBM12B PE=1 SV=2	[F]GRPEGGKFDFGK	12	1xAbu-alpha (N-term) [N-Term]	34	9	4	2	2	3	0	2	28.322	27.947	27.5604	27.1616	27.0696	27.4406	27.8614	28.2599	28.3345	NaN	18.368	NaN	25.2265	25.3121	25.4574
PLEC	Q15149	Plectin OS=Homo sapiens OX=9606 GN=PLEC PE=1 SV=3	[Q]SVQRRPELEDSTLR	14	1xAbu-alpha (N-term) [N-Term]	37	9	4	0	2	3	3	1	24.672	24.218	24.2611	24.1289	24.448	24.7095	26.1153	26.7997	26.9523	25.0178	25.1837	24.5361	23.9054	23.9067	24.054
LIG3	K7ERZ5	DNA ligase 3 (Fragment) OS=Homo sapiens OX=9606 GN=LIG3 PE=1 SV=1	[T]GQVTSPVK	8	1xAbu-alpha (N-term) [N-Term]	23	9	4	2	0	3	3	1	25.9943	25.5144	25.7329	NaN	NaN	NaN	NaN	NaN	NaN	22.9885	22.4776	20.8244	19.0469	21.3961	20.6089
YJU2	Q9BW85	YJU2 splicing factor homolog OS=Homo sapiens OX=9606 GN=YJU2 PE=1 SV=1	[Q]SVGSLGSRPPLSR	13	1xAbu-alpha (N-term) [N-Term]	24	9	4	0	3	2	3	1	NaN	20.6594	NaN	23.5869	23.4111	23.6156	24.4329	24.457	24.6413	22.8396	23.114	22.3206	21.0654	NaN	21.0239
CHERP	Q8IWX8	Calcium homeostasis endoplasmic reticulum protein OS=Homo sapiens OX=9606 GN=CHERP PE=1 SV=3	[Q]GGPPHCPPWNNSHEGMWGEQR	21	1xAbu-alpha (N-term) [N-Term];1xCarbamidomethyl [C6]	26	9	4	3	0	3	2	1	24.3661	24.0174	23.9483	NaN	NaN	NaN	26.1073	26.9096	26.3703	25.2153	25.6267	24.5973	23.8167	23.0306	24.0115
PDCD6IP	Q8WUM4	Programmed cell death 6-interacting protein OS=Homo sapiens OX=9606 GN=PDCD6IP PE=1 SV=1	[Q]SSPAGGHAPTPPTPAPR	17	1xAbu-alpha (N-term) [N-Term]	27	9	4	1	2	3	3	0	22.0233	21.0396	21.3721	24.5989	24.7582	25.0869	23.0969	24.2009	24.4791	25.1791	25.4702	24.976	NaN	NaN	20.4158
SQSTM1	Q13501	Sequestosome-1 OS=Homo sapiens OX=9606 GN=SQSTM1 PE=1 SV=1	[Q]SLQMPESEGPSSLDPSQEGPTGLK	24	1xAbu-alpha (N-term) [N-Term]	28	9	4	3	1	3	2	0	23.6816	22.9587	22.3823	21.2934	21.4254	NaN	26.4659	26.8991	26.5266	26.1975	26.4534	26.5003	NaN	NaN	NaN
NUP62	P37198	Nuclear pore glycoprotein p62 OS=Homo sapiens OX=9606 GN=NUP62 PE=1 SV=3	[A]GAPTAGTQGFSLK	13	1xAbu-alpha (N-term) [N-Term]	19	9	4	3	3	2	1	0	23.8913	23.1678	23.7669	22.5992	22.187	22.0193	24.1077	24.1005	23.6846	NaN	NaN	NaN	20.5348	20.4281	NaN
LSM14A	A0A140TA76	Protein LSM14 homolog A (Fragment) OS=Homo sapiens OX=9606 GN=LSM14A PE=1 SV=1	[F]GTETSNSGTLPQSSAVGSAFTQDTR	25	1xAbu-alpha (N-term) [N-Term]	12	8	4	1	3	0	2	2	23.8295	23.0203	23.2907	24.7733	24.5711	24.851	NaN	NaN	NaN	NaN	19.8	20.6962	NaN	NaN	NaN
AHCTF1	Q8WYP5	Protein ELYS OS=Homo sapiens OX=9606 GN=AHCTF1 PE=1 SV=3	[S]GFSEFTPQSILR	12	1xAbu-alpha (N-term) [N-Term]	22	8	3	0	0	2	3	3	24.3902	24.3029	24.4035	NaN	NaN	20.8206	21.341	25.0778	NaN	23.0164	22.8118	22.8804	23.6218	23.2837	23.3035
KIF23	A0A2U3TZL8	Kinesin-like protein OS=Homo sapiens OX=9606 GN=KIF23 PE=1 SV=1	[Q]GMVTETTMK	9	1xAbu-alpha (N-term) [N-Term]	23	8	4	0	1	2	2	3	20.5483	20.2991	NaN	22.8831	22.6482	22.7923	25.6043	25.7027	26.0393	24.5207	24.166	NaN	22.3401	22.0864	22.0835
R3HDM2	B5MCG9	R3H domain-containing protein 2 OS=Homo sapiens OX=9606 GN=R3HDM2 PE=1 SV=2	[Q]GMIGVQQPQNQGLLSSQR	18	1xAbu-alpha (N-term) [N-Term]	36	8	3	0	3	0	2	3	23.2522	21.3392	20.8955	26.1524	26.0054	26.2953	23.0619	23.4958	23.923	23.7748	23.7821	23.8491	22.8653	22.7054	22.6842
YAP1	P46937	Transcriptional coactivator YAP1 OS=Homo sapiens OX=9606 GN=YAP1 PE=1 SV=2	[T]GVVSGPAATPTAQHLR	16	1xAbu-alpha (N-term) [N-Term]	23	8	3	3	2	0	0	3	26.131	25.4299	25.5782	24.5498	24.3024	24.6275	25.2023	25.6602	25.785	23.7761	24.5464	NaN	25.1947	24.803	25.1862
ILF3	Q12906	Interleukin enhancer-binding factor 3 OS=Homo sapiens OX=9606 GN=ILF3 PE=1 SV=3	[Q]SYNQSPYSNYGPPQGK	16	1xAbu-alpha (N-term) [N-Term]	29	8	4	2	0	1	3	2	20.9974	23.5015	22.0153	NaN	NaN	NaN	20.9782	20.2726	NaN	25.1965	25.2868	24.928	21.0497	18.9436	20.2305
STAT3	P40763	Signal transducer and activator of transcription 3 OS=Homo sapiens OX=9606 GN=STAT3 PE=1 SV=2	[Q]GGQANHPTAAVVTEK	15	1xAbu-alpha (N-term) [N-Term]	25	8	3	0	3	0	3	2	21.9229	21.0799	21.5215	23.222	23.243	23.4461	22.4926	21	22.8818	18.7345	18.2108	17.8654	NaN	25.2846	NaN
KHDC4	Q7Z7F0	KH homology domain-containing protein 4 OS=Homo sapiens OX=9606 GN=KHDC4 PE=1 SV=1	[L]GTGFSSQNEIEGAGSKPASSSGK	23	1xAbu-alpha (N-term) [N-Term]	22	8	5	2	1	2	1	2	26.9471	26.1833	26.4875	NaN	24.9505	25.3235	24.196	25.1383	25.4576	20.058	20.1098	19.2444	23.9481	23.9833	24.1718
SP3	H0Y7L6	Transcription factor Sp3 (Fragment) OS=Homo sapiens OX=9606 GN=SP3 PE=1 SV=1	[T]GQAMDSSDNSERTGER	16	1xAbu-alpha (N-term) [N-Term]	17	8	3	3	0	3	0	2	20.4323	19.4803	20.798	NaN	NaN	NaN	19.4929	20.442	19.9092	19.079	18.8855	17.1191	19.9357	20.4584	20.1461
EPB41	A0A2R8Y7Y3	Protein 4.1 OS=Homo sapiens OX=9606 GN=EPB41 PE=1 SV=1	[QX]GQVAEGGVLDASAKK	15	1xAbu-alpha (N-term) [N-Term]	28	8	4	0	1	3	3	1	NaN	NaN	NaN	21.7041	21.5206	22.3072	26.1569	26.6339	26.8006	27.2125	27.4841	25.4739	27.8585	27.185	27.8996
HTATSF1	O43719	HIV Tat-specific factor 1 OS=Homo sapiens OX=9606 GN=HTATSF1 PE=1 SV=1	[Q]ANYGFSNDGASSSTANVEDVHAR	23	1xAbu-alpha (N-term) [N-Term]	27	8	4	0	2	3	2	1	NaN	NaN	NaN	23.1644	22.8247	23.361	25.8743	26.605	26.613	23.7827	24.153	23.4999	20.7406	NaN	20.3513
TAF7	Q15545	Transcription initiation factor TFIID subunit 7 OS=Homo sapiens OX=9606 GN=TAF7 PE=1 SV=1	[Q]GLDISSPGMSGHR	13	1xAbu-alpha (N-term) [N-Term]	19	8	4	0	3	2	2	1	NaN	NaN	NaN	22.5155	22.2526	22.0831	25.061	26.7171	25.3762	NaN	NaN	18.6561	NaN	NaN	NaN
RAE1	B0QZ37	mRNA export factor (Fragment) OS=Homo sapiens OX=9606 GN=RAE1 PE=1 SV=1	[S]GTSMFGSATTDNHNPMK	17	1xAbu-alpha (N-term) [N-Term]	37	8	4	2	3	0	2	1	27.3916	26.8642	26.8934	27.1738	27.0967	27.2526	NaN	NaN	NaN	24.9423	24.9169	24.4183	21.4442	21.6353	21.5773
NUP214	P35658	Nuclear pore complex protein Nup214 OS=Homo sapiens OX=9606 GN=NUP214 PE=1 SV=2	[Q]GADSTMLATK	10	1xAbu-alpha (N-term) [N-Term]	21	8	3	0	2	3	3	0	19.6903	NaN	20.4895	25.1454	25.0257	25.2689	24.1295	24.3658	24.3699	24.7751	24.5098	24.4586	19.2955	17.546	19.0591
TNKS1BP1	Q9C0C2	182 kDa tankyrase-1-binding protein OS=Homo sapiens OX=9606 GN=TNKS1BP1 PE=1 SV=4	[R]AAEPQEQEFGK	11	1xAbu-alpha (N-term) [N-Term]	20	8	3	0	2	3	3	0	NaN	NaN	NaN	22.4429	22.5001	22.8751	22.6603	23.2188	22.979	NaN	NaN	NaN	NaN	NaN	NaN
FOXK1	P85037	Forkhead box protein K1 OS=Homo sapiens OX=9606 GN=FOXK1 PE=1 SV=1	[Q]GAAGGSHDAAGAAVLDLGSEAR	22	1xAbu-alpha (N-term) [N-Term]	32	8	3	2	0	3	3	0	25.1094	24.463	24.9387	20.668	21.646	21.6158	27.5467	27.7223	27.6496	25.634	25.9053	25.2486	20.7761	NaN	NaN
HNRNPM	P52272	Heterogeneous nuclear ribonucleoprotein M OS=Homo sapiens OX=9606 GN=HNRNPM PE=1 SV=3	[Q]GGGGGGGSVPGIER	14	1xAbu-alpha (N-term) [N-Term]	26	8	3	2	0	3	3	0	26.2325	25.8709	25.7645	26.7985	26.8276	26.983	24.5508	24.8315	24.9448	27.8701	27.9375	27.6543	26.3937	26.4299	26.5592
TCF3	P15923	Transcription factor E2-alpha OS=Homo sapiens OX=9606 GN=TCF3 PE=1 SV=1	[Q]GLAGTSQWPR	10	1xAbu-alpha (N-term) [N-Term]	20	8	3	2	3	0	3	0	23.0126	22.5384	22.3401	20.7195	NaN	NaN	22.4276	23.0396	22.3404	24.0963	24.8562	24.5578	20.0357	NaN	NaN
SHROOM3	Q8TF72	Protein Shroom3 OS=Homo sapiens OX=9606 GN=SHROOM3 PE=1 SV=2	[Q]GLVTDTR	7	1xAbu-alpha (N-term) [N-Term]	20	8	3	0	3	3	2	0	23.7647	23.0144	23.3678	25.6425	25.2542	25.3748	26.0282	25.8228	25.8715	24.6643	23.9295	22.5527	NaN	NaN	NaN
HNRNPD	D6RBQ9	Heterogeneous nuclear ribonucleoprotein D0 (Fragment) OS=Homo sapiens OX=9606 GN=HNRNPD PE=1 SV=1	[Q]GAAAAAGSGAGTGGGTASGGTEGGSAESEGAKIDASKNEEDEGK	44	1xAbu-alpha (N-term) [N-Term]	22	8	4	1	2	3	2	0	23.7158	22.7774	23.244	24.9593	25.029	25.7616	24.9453	26.1863	25.2763	25.2996	25.384	25.0147	NaN	NaN	NaN
HNRNPM	M0QZM1;P52272	Heterogeneous nuclear ribonucleoprotein M (Fragment) OS=Homo sapiens OX=9606 GN=HNRNPM PE=1 SV=1;Heterogeneous nuclear ribonucleoprotein M OS=Homo sapiens OX=9606 GN=HNRNPM PE=1 SV=3	[P]AMGPALGAGIER	12	1xAbu-alpha (N-term) [N-Term]	19	8	4	2	1	3	2	0	23.9528	23.536	22.0116	22.5188	NaN	22.4404	24.5857	24.7452	23.8507	26.045	26.1509	25.7237	23.9539	NaN	24.1798
PCBP2	F8VZX2;Q15366	Poly(rC)-binding protein 2 OS=Homo sapiens OX=9606 GN=PCBP2 PE=1 SV=1;Poly(rC)-binding protein 2 OS=Homo sapiens OX=9606 GN=PCBP2 PE=1 SV=1	[Q]SHFPMTHGNTGFSGIESSSPEVK	23	1xAbu-alpha (N-term) [N-Term];1xOxidation [M5]	25	7	3	0	1	0	3	3	22.1985	21.2864	19.7102	20.7843	NaN	23.6725	NaN	NaN	21.6239	23.6829	25.6088	25.3623	24.257	22.6558	23.0487
CBX8	Q9HC52	Chromobox protein homolog 8 OS=Homo sapiens OX=9606 GN=CBX8 PE=1 SV=3	[M]GLSPPASSTSTSSTCRAEAPR	21	1xAbu-alpha (N-term) [N-Term];1xCarbamidomethyl [C15]	18	7	3	1	0	0	3	3	22.0552	NaN	NaN	NaN	NaN	NaN	NaN	NaN	NaN	20.7024	21.4277	21.4017	21.9382	21.969	22.1392
PCBP2	F8VZX2;Q15366	Poly(rC)-binding protein 2 OS=Homo sapiens OX=9606 GN=PCBP2 PE=1 SV=1;Poly(rC)-binding protein 2 OS=Homo sapiens OX=9606 GN=PCBP2 PE=1 SV=1	[H]GNTGFSGIESSSPEVK	16	1xAbu-alpha (N-term) [N-Term]	31	7	4	2	1	1	0	3	27.5444	27.3316	27.176	21.7808	23.0166	22.9302	22.645	22.6695	21.6991	23.7619	24.5053	24.1728	27.1331	26.8676	27.0682
RBM14	Q96PK6	RNA-binding protein 14 OS=Homo sapiens OX=9606 GN=RBM14 PE=1 SV=2	[G]AVANANSTPPPYER	14	1xAbu-alpha (N-term) [N-Term]	15	7	3	3	0	1	0	3	22.3832	22.7509	22.3604	NaN	NaN	NaN	NaN	NaN	NaN	NaN	18.577	NaN	20.5038	21.0611	20.7894
CAPRIN1	Q14444	Caprin-1 OS=Homo sapiens OX=9606 GN=CAPRIN1 PE=1 SV=2	[P]VAQADPLVR	9	1xAbu-alpha (N-term) [N-Term]	21	7	3	0	0	2	3	2	NaN	NaN	NaN	19.4266	20.5064	21.6881	23.3508	23.8461	24.0042	23.7717	23.4188	22.0395	22.9214	NaN	22.6901
PTBP1	A0A0U1RRM4	Polypyrimidine tract-binding protein 1 OS=Homo sapiens OX=9606 GN=PTBP1 PE=1 SV=1	[AF]GLSVPNVHGALAPLAIPSAAAAAAAAGR	28	1xAbu-alpha (N-term) [N-Term]	31	7	4	1	1	0	3	2	NaN	NaN	NaN	23.4913	23.4866	24.1844	NaN	NaN	NaN	25.6947	25.9754	21.6524	20.6322	19.5861	21.1499
OSBPL9	E9PK98	Oxysterol-binding protein-related protein 9 OS=Homo sapiens OX=9606 GN=OSBPL9 PE=1 SV=1	[C]GGLDSGFVPSVQDFDK	16	1xAbu-alpha (N-term) [N-Term]	21	7	4	0	1	2	2	2	NaN	NaN	21.1417	23.4412	23.5064	23.3064	24.9876	24.8972	25.0602	23.2572	23.4684	23.44	21.6702	21.98	21.5501
TCF12	Q99081	Transcription factor 12 OS=Homo sapiens OX=9606 GN=TCF12 PE=1 SV=1	[R]GNAAGSSQTGDALGK	15	1xAbu-alpha (N-term) [N-Term]	18	7	3	3	0	0	3	1	21.6973	21.0497	21.1557	18.7329	18.1212	18.7114	NaN	18.7479	19.0602	20.3014	20.7333	20.2414	17.9227	19.0289	18.9412
ERCC6	D6R9X7	DNA excision repair protein ERCC-6 (Fragment) OS=Homo sapiens OX=9606 GN=ERCC6 PE=1 SV=1	[Q]GVLQQVDNAIHEASR	15	1xAbu-alpha (N-term) [N-Term]	26	7	4	0	1	3	2	1	NaN	NaN	NaN	23.0403	22.2315	23.3421	26.4231	26.5104	26.6285	21.6728	20.2987	NaN	23.3437	23.5741	23.2531
KRT18	P05783	Keratin, type I cytoskeletal 18 OS=Homo sapiens OX=9606 GN=KRT18 PE=1 SV=2	[Q]SAEVGAAETTLTELRR	16	1xAbu-alpha (N-term) [N-Term]	34	7	4	1	0	3	2	1	NaN	NaN	NaN	NaN	NaN	NaN	28.0937	28.2929	28.3544	25.8234	26.109	25.8973	21.7251	21.6136	21.5509
LARP4	Q71RC2	La-related protein 4 OS=Homo sapiens OX=9606 GN=LARP4 PE=1 SV=3	[S]GGSEHSTEGSVSLGDGQLNR	20	1xAbu-alpha (N-term) [N-Term]	17	7	4	2	0	3	1	1	NaN	NaN	NaN	NaN	NaN	NaN	NaN	NaN	NaN	21.2627	22.7279	22.1904	21.2693	NaN	NaN
PCNT	O95613	Pericentrin OS=Homo sapiens OX=9606 GN=PCNT PE=1 SV=4	[Q]GVQDGDLEADTER	13	1xAbu-alpha (N-term) [N-Term]	18	7	4	0	3	2	1	1	NaN	NaN	NaN	23.0737	22.2693	22.3403	24.1222	24.3702	24.5846	NaN	NaN	18.229	19.9353	20.3519	NaN
PPP4R2	H7C559	Serine/threonine-protein phosphatase 4 regulatory subunit 2 (Fragment) OS=Homo sapiens OX=9606 GN=PPP4R2 PE=1 SV=1	[N]GLPESTDSK	9	1xAbu-alpha (N-term) [N-Term]	17	7	3	3	0	3	0	1	24.8264	24.0226	24.53	21.8834	19.2974	19.3003	24.2741	24.1688	24.4437	22.9036	22.9683	22.846	24.8267	24.9371	24.904
SCYL2	Q6P3W7	SCY1-like protein 2 OS=Homo sapiens OX=9606 GN=SCYL2 PE=1 SV=1	[S]GFNMPVNTNQNFYSSPSTVGVTK	23	1xAbu-alpha (N-term) [N-Term]	21	7	4	1	3	2	0	1	22.9074	22.3733	21.1978	23.1789	22.4517	23.7132	20.9333	23.5464	21.3228	NaN	NaN	NaN	20.7009	NaN	NaN
PRRC2A	P48634	Protein PRRC2A OS=Homo sapiens OX=9606 GN=PRRC2A PE=1 SV=3	[L]GAVPAPQAPPPPPK	14	1xAbu-alpha (N-term) [N-Term]	27	7	3	3	3	0	0	1	25.5702	25.086	24.9169	24.6927	24.792	24.7548	26.2644	26.2975	26.1605	21.0857	19.9761	19.4167	22.4322	21.4598	21.9525
SNRPA	P09012	U1 small nuclear ribonucleoprotein A OS=Homo sapiens OX=9606 GN=SNRPA PE=1 SV=3	[P]GMPPMTQAPR	10	1xAbu-alpha (N-term) [N-Term]	75	7	3	0	1	3	3	0	20.0749	22.1667	23.0095	25.3392	25.2268	25.257	30.147	30.1673	30.1552	29.6787	29.5859	29.1728	23.2811	22.9556	22.8875
MYPN	A0A087WX60	Myopalladin OS=Homo sapiens OX=9606 GN=MYPN PE=1 SV=1	[Q]AQHLVAQPR	9	1xAbu-alpha (N-term) [N-Term]	21	7	3	1	3	0	3	0	23.2218	22.2809	22.8127	24.0702	23.9139	24.0265	19.1837	18.8521	19.4955	22.0168	22.2899	20.9015	NaN	NaN	NaN
PPP6R1	Q9UPN7	Serine/threonine-protein phosphatase 6 regulatory subunit 1 OS=Homo sapiens OX=9606 GN=PPP6R1 PE=1 SV=5	[Q]GLPTQSLASPPAR	13	1xAbu-alpha (N-term) [N-Term]	37	7	3	1	3	0	3	0	27.3117	26.9443	27.0526	26.7576	26.7958	26.7832	27.891	27.4591	27.5312	26.4508	26.5013	26.0243	NaN	NaN	NaN
OTUD4	Q01804	OTU domain-containing protein 4 OS=Homo sapiens OX=9606 GN=OTUD4 PE=1 SV=4	[Q]GIHSENGPVLVEELGK	16	1xAbu-alpha (N-term) [N-Term]	24	7	3	0	2	3	2	0	22.2368	NaN	22.9159	24.7446	24.7729	24.9577	25.5007	25.4416	25.0138	22.8015	23.3603	23.1292	20.987	NaN	NaN
HNRNPK	P61978;Q5T6W2	Heterogeneous nuclear ribonucleoprotein K OS=Homo sapiens OX=9606 GN=HNRNPK PE=1 SV=1;Heterogeneous nuclear ribonucleoprotein K (Fragment) OS=Homo sapiens OX=9606 GN=HNRNPK PE=1 SV=1	[Q]MAYEPQGGSGYDYSYAGGR	19	1xAbu-alpha (N-term) [N-Term]	23	7	3	0	2	3	2	0	NaN	NaN	NaN	21.0352	22.6771	22.3397	22.5032	23.0054	22.7963	24.6167	23.5409	24.1539	NaN	NaN	NaN
NUP214	P35658	Nuclear pore complex protein Nup214 OS=Homo sapiens OX=9606 GN=NUP214 PE=1 SV=2	[Q]GFGFSSPNK	9	1xAbu-alpha (N-term) [N-Term]	22	7	3	2	0	3	2	0	24.0753	23.9835	23.2838	22.3632	22.6337	22.5973	24.1885	23.8051	24.4201	22.9789	23.1938	22.9779	21.8914	22.7986	22.7331
USO1	O60763	General vesicular transport factor p115 OS=Homo sapiens OX=9606 GN=USO1 PE=1 SV=2	[Q]GETETIIATK	10	1xAbu-alpha (N-term) [N-Term]	22	6	2	0	0	0	3	3	21.9559	22.6055	21.944	20.374	22.545	22.829	22.4934	NaN	21.231	25.128	25.0914	24.6449	22.0127	21.5505	22.1589
IGF2BP2	Q9Y6M1	Insulin-like growth factor 2 mRNA-binding protein 2 OS=Homo sapiens OX=9606 GN=IGF2BP2 PE=1 SV=2	[T]GLSVLSPPAGPR	12	1xAbu-alpha (N-term) [N-Term]	30	6	2	0	0	0	3	3	NaN	NaN	NaN	NaN	NaN	NaN	NaN	NaN	NaN	24.3505	24.7758	24.8475	26.717	26.738	26.6138
SPAG7	I3L4C3	Sperm-associated antigen 7 OS=Homo sapiens OX=9606 GN=SPAG7 PE=1 SV=1	[P]VVVSPASDYK	10	1xAbu-alpha (N-term) [N-Term]	24	6	2	0	0	0	3	3	22.3999	21.8013	23.5151	NaN	NaN	NaN	26.6766	26.703	26.8505	25.1535	25.407	25.0611	23.2435	22.0915	23.3072
HNRNPL	P14866	Heterogeneous nuclear ribonucleoprotein L OS=Homo sapiens OX=9606 GN=HNRNPL PE=1 SV=2	[R]YYGGGSEGGRAPK	13	1xAbu-alpha (N-term) [N-Term]	37	6	2	0	0	3	0	3	23.1798	22.3545	22.6191	NaN	17.3552	NaN	28.5158	28.9483	29.0594	22.3153	22.1786	21.4708	22.5798	22.689	22.6829
FUBP1	Q96AE4	Far upstream element-binding protein 1 OS=Homo sapiens OX=9606 GN=FUBP1 PE=1 SV=3	[N]AYPHWQQQAPPDPAK	15	1xAbu-alpha (N-term) [N-Term]	19	6	3	2	0	1	0	3	24.9984	24.2501	24.0146	21.3829	20.4979	22.6957	22.6148	23.7703	23.0043	22.4694	23.0652	22.7311	23.3725	22.7734	23.4771
HNRNPM	P52272	Heterogeneous nuclear ribonucleoprotein M OS=Homo sapiens OX=9606 GN=HNRNPM PE=1 SV=3	[L]AMGGGGGASFDR	12	1xAbu-alpha (N-term) [N-Term];1xOxidation [M2]	20	6	2	0	3	0	0	3	18.6849	19.9264	18.3453	22.149	21.8885	22.339	18.9157	NaN	18.3325	NaN	NaN	NaN	20.0595	20.4966	20.8744
INS	P01308	Insulin OS=Homo sapiens OX=9606 GN=INS PE=1 SV=1	[A]LYLVCGER	8	1xAbu-alpha (N-term) [N-Term];1xCarbamidomethyl [C5]	19	6	3	0	0	1	3	2	23.0823	22.7988	22.9522	NaN	NaN	NaN	23.9403	23.3896	23.8598	19.8536	20.5541	20.6848	21.5224	21.9801	21.465
ZFR	Q96KR1	Zinc finger RNA-binding protein OS=Homo sapiens OX=9606 GN=ZFR PE=1 SV=2	[Q]GATQYTQAQQTR	12	1xAbu-alpha (N-term) [N-Term]	20	6	3	0	0	2	2	2	20.0676	NaN	NaN	NaN	NaN	NaN	22.3493	22.2643	22.5227	22.4577	22.2948	22.5469	20.6798	20.7821	20.8005
PLEC	Q15149	Plectin OS=Homo sapiens OX=9606 GN=PLEC PE=1 SV=3	[Q]GLASYDYVR	9	1xAbu-alpha (N-term) [N-Term]	21	6	3	0	0	3	1	2	22.2614	24.0251	NaN	NaN	NaN	NaN	28.5745	28.775	28.3968	22.4413	22.5007	21.5481	23.7934	23.9959	23.8268
GAGE2A	Q6NT46	G antigen 2A OS=Homo sapiens OX=9606 GN=GAGE2A PE=1 SV=1	[Q]GHPQTGCECEDGPDGQEMDPPNPEEVK	27	1xAbu-alpha (N-term) [N-Term];2xCarbamidomethyl [C7;C9]	34	6	3	0	0	3	1	2	NaN	NaN	NaN	NaN	NaN	NaN	27.8547	29.5848	29.4937	22.7462	23.0743	22.234	23.4847	23.3143	23.3339
DMD	E9PDN5	Dystrophin OS=Homo sapiens OX=9606 GN=DMD PE=1 SV=1	[D]SAPASSPQLSHDDTHSR	17	1xAbu-alpha (N-term) [N-Term]	17	6	4	0	1	2	1	2	22.1357	18.0305	20.9063	19.5163	20.7134	20.6469	22.2315	23.3491	23.4269	20.1807	20.3233	20.6131	21.2573	20.6483	21.0879
PARP10	E9PPE7	Poly [ADP-ribose] polymerase 10 OS=Homo sapiens OX=9606 GN=PARP10 PE=1 SV=1	[T]GSGQEPGQSGTSLR	14	1xAbu-alpha (N-term) [N-Term]	19	6	3	3	0	0	1	2	22.8853	21.8726	22.1225	21.06	20.8076	21.4504	21.2095	20.925	21.7165	22.3443	22.5674	22.1881	23.4173	23.4435	23.3087
CLNS1A	E9PMI6	Methylosome subunit pICln OS=Homo sapiens OX=9606 GN=CLNS1A PE=1 SV=1	[Q]GQGDIPTFYTYEEGLSHLTAEGQATLER	28	1xAbu-alpha (N-term) [N-Term]	20	6	4	1	1	2	0	2	23.2972	NaN	22.7038	26.8181	27.1912	27.193	25.7858	26.0756	26.2038	25.3899	24.9933	25.6119	24.7251	24.9113	25.1086
SPEN	Q96T58	Msx2-interacting protein OS=Homo sapiens OX=9606 GN=SPEN PE=1 SV=1	[H]GVQIVHSSGELFQEYR	16	1xAbu-alpha (N-term) [N-Term]	16	6	3	2	0	2	0	2	24.989	24.6592	24.5017	22.4081	NaN	20.4087	24.972	25.3146	23.3124	NaN	NaN	NaN	23.624	23.6584	23.2914
SLC30A1	Q9Y6M5	Zinc transporter 1 OS=Homo sapiens OX=9606 GN=SLC30A1 PE=1 SV=3	[Q]CCGTLPQAPSGK	12	1xAbu-alpha (N-term) [N-Term];2xCarbamidomethyl [C1;C2]	20	6	3	0	0	2	3	1	NaN	NaN	NaN	NaN	NaN	NaN	21.7566	21.7815	20.5742	23.0499	23.4242	22.8805	20.1317	NaN	20.4566
TNKS1BP1	Q9C0C2	182 kDa tankyrase-1-binding protein OS=Homo sapiens OX=9606 GN=TNKS1BP1 PE=1 SV=4	[P]GSADLEDGEMGK	12	1xAbu-alpha (N-term) [N-Term]	17	6	3	0	0	3	2	1	NaN	NaN	NaN	NaN	NaN	NaN	25.1455	25.2464	25.6082	24.5381	24.4682	23.8497	20.6727	19.9643	20.6766
SCYL1	Q96KG9	N-terminal kinase-like protein OS=Homo sapiens OX=9606 GN=SCYL1 PE=1 SV=1	[Q]GWQEPSSQEPPPDGTR	16	1xAbu-alpha (N-term) [N-Term]	44	6	4	0	1	2	2	1	21.5743	NaN	19.8282	20.6509	18.8674	20.0689	24.4499	25.2506	24.5576	23.517	24.0953	23.855	22.2858	NaN	18.4514
COPA	P53621	Coatomer subunit alpha OS=Homo sapiens OX=9606 GN=COPA PE=1 SV=2	[K]SLAYLTAATHGLDEEAESLK	20	1xAbu-alpha (N-term) [N-Term]	16	6	4	1	0	2	2	1	22.4583	22.0303	22.7959	22.3363	18.6111	NaN	24.7576	24.3536	24.8439	21.2399	21.8257	21.4612	22.3991	21.5076	22.3128
CSTF2	E7EWR4	Cleavage stimulation factor subunit 2 OS=Homo sapiens OX=9606 GN=CSTF2 PE=1 SV=1	[Q]GTGMQGASIQGGSQPGGFSPGQNQVTPQDHEK	32	1xAbu-alpha (N-term) [N-Term]	24	6	4	2	0	1	2	1	22.8049	21.7538	21.8678	NaN	NaN	NaN	NaN	NaN	NaN	21.6971	23.4533	21.9693	21.4554	NaN	NaN
HNRNPM	M0QZM1	Heterogeneous nuclear ribonucleoprotein M (Fragment) OS=Homo sapiens OX=9606 GN=HNRNPM PE=1 SV=1	[I]NGGGGGSVPGIER	13	1xAbu-alpha (N-term) [N-Term]	15	6	4	1	3	0	1	1	26.2325	25.8709	25.7645	26.7985	26.8276	26.983	24.5508	24.8315	24.9448	27.8701	27.9375	27.6543	26.3937	26.4299	26.5592
NUP98	H7BYP8;A0A3B3ITD8	Nuclear pore complex protein Nup98-Nup96 (Fragment) OS=Homo sapiens OX=9606 GN=NUP98 PE=4 SV=1;Nuclear pore complex protein Nup98-Nup96 OS=Homo sapiens OX=9606 GN=NUP98 PE=1 SV=1	[T]GFGAVGSTLFGNNK	14	1xAbu-alpha (N-term) [N-Term]	19	6	3	2	0	3	0	1	27.7069	27.1228	26.383	NaN	NaN	NaN	23.1361	23.3465	22.9605	21.4739	21.4738	23.7598	27.4121	27.2345	27.1076
SF3B2	E9PPJ0	Splicing factor 3B subunit 2 OS=Homo sapiens OX=9606 GN=SF3B2 PE=1 SV=1	[Q]GVEVALAPEELELDPMAMTQK	21	1xAbu-alpha (N-term) [N-Term]	30	6	2	0	0	3	3	0	20.5406	NaN	NaN	19.8202	NaN	NaN	24.6489	24.8222	24.7739	25.1011	24.7269	24.7521	NaN	20.6915	NaN
SAP130	Q9H0E3	Histone deacetylase complex subunit SAP130 OS=Homo sapiens OX=9606 GN=SAP130 PE=1 SV=1	[Q]GLQPAPMGTQQPQPEGK	17	1xAbu-alpha (N-term) [N-Term]	36	6	2	0	0	3	3	0	NaN	NaN	NaN	NaN	20.2088	20.7276	26.696	27.1108	27.0965	23.8455	23.8986	23.3466	20.4052	NaN	19.7687
MKI67	P46013	Proliferation marker protein Ki-67 OS=Homo sapiens OX=9606 GN=MKI67 PE=1 SV=2	[Q]SLVISPPAPSPR	12	1xAbu-alpha (N-term) [N-Term]	30	6	2	0	0	3	3	0	21.896	21.0421	22.1341	22.3364	NaN	NaN	28.5783	28.3646	28.2602	25.2013	25.4111	25.3389	NaN	NaN	NaN
PABPC4	Q13310;H0Y6X6	Polyadenylate-binding protein 4 OS=Homo sapiens OX=9606 GN=PABPC4 PE=1 SV=1;Polyadenylate-binding protein 4 (Fragment) OS=Homo sapiens OX=9606 GN=PABPC4 PE=1 SV=1	[Q]GQEPLTASMLAAAPPQEQK	19	1xAbu-alpha (N-term) [N-Term]	30	6	2	0	0	3	3	0	21.5885	21.6074	21.5006	NaN	NaN	NaN	23.7343	24.6267	22.7206	24.9926	25.1294	24.995	NaN	NaN	NaN
NUP43	Q8NFH3	Nucleoporin Nup43 OS=Homo sapiens OX=9606 GN=NUP43 PE=1 SV=1	[Q]SVISSWLSTDPAK	13	1xAbu-alpha (N-term) [N-Term]	17	6	2	0	0	3	3	0	21.7289	NaN	NaN	22.5343	NaN	NaN	27.9689	27.5099	27.562	23.8711	24.1308	24.1871	NaN	NaN	NaN
CDC5L	Q99459	Cell division cycle 5-like protein OS=Homo sapiens OX=9606 GN=CDC5L PE=1 SV=2	[S]GVSEFTKK	8	1xAbu-alpha (N-term) [N-Term]	20	6	2	0	0	3	3	0	20.9518	20.5423	NaN	NaN	20.7147	21.44	25.8402	25.6927	25.9222	23.7189	23.4565	22.4034	NaN	17.0922	17.1717
SRRM2	Q9UQ35	Serine/arginine repetitive matrix protein 2 OS=Homo sapiens OX=9606 GN=SRRM2 PE=1 SV=2	[A]GGSMMDGPGPR	11	1xAbu-alpha (N-term) [N-Term];1xOxidation [M]	23	6	2	0	0	3	3	0	19.3005	NaN	NaN	NaN	NaN	16.8988	22.5663	22.6517	23.2963	21.5323	21.6315	17.3696	NaN	NaN	NaN
DIXDC1	Q155Q3	Dixin OS=Homo sapiens OX=9606 GN=DIXDC1 PE=1 SV=2	[Q]GAAAALADVCHDMSR	15	1xAbu-alpha (N-term) [N-Term];1xCarbamidomethyl [C10]	17	6	2	0	0	3	3	0	NaN	NaN	NaN	NaN	NaN	NaN	24.3576	24.1113	23.6965	22.4997	22.7694	22.8163	21.8439	21.8089	21.4732
SNRPA	P09012	U1 small nuclear ribonucleoprotein A OS=Homo sapiens OX=9606 GN=SNRPA PE=1 SV=3	[P]GMPPMTQAPR	10	1xAbu-alpha (N-term) [N-Term];1xOxidation [M]	102	6	2	0	0	3	3	0	NaN	NaN	NaN	21.9445	22.1096	23.0238	27.1378	27.2286	26.2842	26.4846	26.6693	25.9565	NaN	NaN	NaN
NUFIP2	Q7Z417	Nuclear fragile X mental retardation-interacting protein 2 OS=Homo sapiens OX=9606 GN=NUFIP2 PE=1 SV=1	[Q]GLETFKPDYSEQK	13	1xAbu-alpha (N-term) [N-Term]	29	6	3	1	0	2	3	0	23.7825	23.3902	22.7519	20.2359	19.8478	20.9572	25.6573	25.7676	25.7109	27.4016	27.5707	27.4196	26.6637	26.495	26.5717
EIF4G3	A0A0U1RQK7	Eukaryotic translation initiation factor 4 gamma 3 OS=Homo sapiens OX=9606 GN=EIF4G3 PE=1 SV=1	[Q]SAPIIVPTQQQPPPAKR	17	1xAbu-alpha (N-term) [N-Term]	19	6	3	1	0	2	3	0	NaN	24.7273	NaN	21.6504	NaN	20.9595	23.6172	24.2247	23.9311	22.5856	22.8463	22.2763	18.6358	18.3728	NaN
TNKS1BP1	Q9C0C2	182 kDa tankyrase-1-binding protein OS=Homo sapiens OX=9606 GN=TNKS1BP1 PE=1 SV=4	[Q]GASQDYGLGGASPR	14	1xAbu-alpha (N-term) [N-Term]	22	6	3	0	2	1	3	0	21.9631	20.2005	NaN	22.8143	23.0824	23.4509	24.2253	24.7603	24.8221	24.7363	25.0117	24.7191	20.3058	NaN	NaN
SLAIN2	Q9P270	SLAIN motif-containing protein 2 OS=Homo sapiens OX=9606 GN=SLAIN2 PE=1 SV=2	[Q]GAGSLGPGSPVR	12	1xAbu-alpha (N-term) [N-Term]	21	6	3	0	2	1	3	0	25.3715	26.0717	25.7633	28.031	23.3301	23.3441	25.8127	25.9164	24.1455	23.7094	23.7209	23.0994	19.5587	23.0036	19.447
CRYBG3	Q68DQ2	Very large A-kinase anchor protein OS=Homo sapiens OX=9606 GN=CRYBG3 PE=1 SV=3	[P]AISDFSCSK	9	1xAbu-alpha (N-term) [N-Term];1xCarbamidomethyl [C7]	10	6	3	0	2	1	3	0	22.2555	NaN	19.9765	NaN	19.959	NaN	23.7219	24.3774	24.5661	22.335	22.5526	22.0857	19.2574	NaN	NaN
CREM	G5E998	cAMP-responsive element modulator OS=Homo sapiens OX=9606 GN=CREM PE=1 SV=2	[Q]GVVMAASPGSLHSPQQLAEEATR	23	1xAbu-alpha (N-term) [N-Term]	15	6	3	2	0	1	3	0	23.1052	23.2709	NaN	NaN	NaN	NaN	23.8225	NaN	24.2995	26.3749	26.3978	26.2108	NaN	NaN	NaN
MATR3	D6RBS2	Matrin-3 (Fragment) OS=Homo sapiens OX=9606 GN=MATR3 PE=1 SV=1	[L]GMSSSLNQQGAHSALSSASTSSHNLQSIF	29	1xAbu-alpha (N-term) [N-Term]	12	6	3	2	0	1	3	0	24.8411	24.4371	24.1598	22.6862	21.6703	22.9108	NaN	24.0564	23.039	22.1103	22.3506	22.0113	24.687	24.329	24.3529
PPP6R1	Q9UPN7	Serine/threonine-protein phosphatase 6 regulatory subunit 1 OS=Homo sapiens OX=9606 GN=PPP6R1 PE=1 SV=5	[Q]GLPTQSLASPPARDALQLR	19	1xAbu-alpha (N-term) [N-Term]	16	6	2	0	3	0	3	0	20.4802	19.9732	NaN	24.062	24.232	24.5849	NaN	NaN	NaN	24.4744	24.4187	24.5191	NaN	NaN	NaN
AMOTL2	Q9Y2J4	Angiomotin-like protein 2 OS=Homo sapiens OX=9606 GN=AMOTL2 PE=1 SV=3	[Q]GWQGLSSSER	10	1xAbu-alpha (N-term) [N-Term]	19	6	2	0	3	0	3	0	22.302	20.2967	21.6115	23.1338	22.8577	22.8301	24.0613	25.7139	24.322	24.4969	24.7493	24.4602	NaN	NaN	NaN
PRPF31	E7EVX8	U4/U6 small nuclear ribonucleoprotein Prp31 OS=Homo sapiens OX=9606 GN=PRPF31 PE=1 SV=1	[Q]GLEIVNPQAAEK	12	1xAbu-alpha (N-term) [N-Term]	18	6	2	0	3	0	3	0	22.8481	NaN	22.5835	27.7971	27.8924	27.9514	NaN	NaN	21.5472	26.2139	26.2459	25.8872	NaN	NaN	NaN
FUBP1	Q96AE4	Far upstream element-binding protein 1 OS=Homo sapiens OX=9606 GN=FUBP1 PE=1 SV=3	[Q]GMPQHPPAPQGQ	12	1xAbu-alpha (N-term) [N-Term]	19	6	2	0	3	0	3	0	NaN	NaN	NaN	23.6864	23.8163	23.406	NaN	20.9334	NaN	24.729	25.0867	24.7408	21.9441	NaN	20.8322
CHTF8	P0CG12	Chromosome transmission fidelity protein 8 homolog isoform 2 OS=Homo sapiens OX=9606 GN=CHTF8 PE=1 SV=1	[Q]GLDLAPILR	9	1xAbu-alpha (N-term) [N-Term]	17	6	3	1	2	0	3	0	22.7577	21.9554	NaN	25.9538	26.5011	26.2621	NaN	NaN	NaN	23.7085	23.5074	23.8419	NaN	NaN	NaN
RPRD2	Q5VT52	Regulation of nuclear pre-mRNA domain-containing protein 2 OS=Homo sapiens OX=9606 GN=RPRD2 PE=1 SV=1	[S]GSSFDNGPSSASELASLGGGGSGGLTGFK	29	1xAbu-alpha (N-term) [N-Term]	14	6	3	0	2	2	2	0	NaN	NaN	NaN	NaN	NaN	NaN	22.9986	23.2052	23.3486	22.1008	22.1394	22.624	NaN	NaN	NaN
MIOS	Q9NXC5	GATOR complex protein MIOS OS=Homo sapiens OX=9606 GN=MIOS PE=1 SV=2	[M]GTPVSSCPGGTK	12	1xAbu-alpha (N-term) [N-Term];1xCarbamidomethyl [C7]	12	6	3	2	0	2	2	0	NaN	NaN	NaN	NaN	NaN	NaN	NaN	NaN	NaN	19.4299	19.2521	NaN	NaN	15.8543	NaN
PRKCSH	K7ELL7	Glucosidase 2 subunit beta OS=Homo sapiens OX=9606 GN=PRKCSH PE=1 SV=1	[Q]ALLSGDTQTDATSFYDR	17	1xAbu-alpha (N-term) [N-Term]	17	6	3	0	3	1	2	0	NaN	NaN	NaN	20.1347	20.968	21.7509	NaN	NaN	21.7076	20.16	20.7135	21.3277	20.5541	20.4064	20.7185
HNRNPA2B1	P22626	Heterogeneous nuclear ribonucleoproteins A2/B1 OS=Homo sapiens OX=9606 GN=HNRNPA2B1 PE=1 SV=2	[D]CVVMRDPASKR	11	1xAbu-alpha (N-term) [N-Term];1xCarbamidomethyl [C1]	11	6	3	3	0	1	2	0	22.1163	24.446	24.4065	NaN	NaN	NaN	21.9683	21.7816	21.2024	20.6558	20.6895	20.4841	17.0978	NaN	NaN
TNRC6B	H0Y720	Trinucleotide repeat-containing gene 6B protein (Fragment) OS=Homo sapiens OX=9606 GN=TNRC6B PE=1 SV=1	[P]GYGSGFSSGGMDYGMVGGK	19	1xAbu-alpha (N-term) [N-Term]	12	6	3	3	0	1	2	0	23.2325	22.8632	22.6915	NaN	NaN	NaN	NaN	21.4187	22.5242	21.3139	20.6007	21.3877	NaN	NaN	NaN
LARP1B	A0A3B3ISF0	La-related protein 1B OS=Homo sapiens OX=9606 GN=LARP1B PE=1 SV=1	[T]GFQSVLSQGNK	11	1xAbu-alpha (N-term) [N-Term]	12	6	2	3	0	3	0	0	24.9724	24.6583	24.2209	NaN	NaN	NaN	23.5661	23.6797	20.9753	NaN	NaN	19.8497	NaN	NaN	NaN
EPB41L2	O43491	Band 4.1-like protein 2 OS=Homo sapiens OX=9606 GN=EPB41L2 PE=1 SV=1	[Q]GSSHETLNIVEEK	13	1xAbu-alpha (N-term) [N-Term]	16	6	2	3	0	3	0	0	24.1436	23.7586	23.479	23.8811	23.6401	23.9476	26.3012	26.6004	26.8938	23.1539	23.2536	22.5217	21.5185	20.2806	20.7282
EPPK1	P58107	Epiplakin OS=Homo sapiens OX=9606 GN=EPPK1 PE=1 SV=3	[L]GAGTPPRPQAR	11	1xAbu-alpha (N-term) [N-Term]	12	6	3	1	3	2	0	0	20.5758	20.1099	19.8453	22.1843	22.0492	22.534	21.1807	21.5683	21.0396	19.6359	18.3678	NaN	NaN	NaN	18.2644
TRIR	K7ERU7	Telomerase RNA component-interacting RNase OS=Homo sapiens OX=9606 GN=TRIR PE=1 SV=1	[Q]GREAPGPAGGGGGGSR	16	1xAbu-alpha (N-term) [N-Term]	12	6	3	3	1	2	0	0	22.6596	22.0958	21.962	21.7727	20.9147	21.2269	20.5237	21.2715	19.1644	NaN	NaN	NaN	NaN	NaN	NaN
TCF12	Q99081	Transcription factor 12 OS=Homo sapiens OX=9606 GN=TCF12 PE=1 SV=1	[L]GSSQFSGSGIDER	13	1xAbu-alpha (N-term) [N-Term]	13	6	2	3	3	0	0	0	23.7997	23.442	23.9155	23.414	23.495	23.8844	21.9769	24.2353	24.6829	NaN	NaN	NaN	NaN	NaN	NaN
BTF3L4	Q96K17;P20290	Transcription factor BTF3 homolog 4 OS=Homo sapiens OX=9606 GN=BTF3L4 PE=1 SV=1;Transcription factor BTF3 OS=Homo sapiens OX=9606 GN=BTF3 PE=1 SV=1	[L]GADSLTSLR	9	1xAbu-alpha (N-term) [N-Term]	10	6	2	3	3	0	0	0	24.2909	24.2312	24.4951	24.3583	24.2778	24.4	24.6525	24.7603	24.4298	NaN	24.4861	20.0469	23.7967	NaN	24.316
TLE3	H0YKT5	Transducin-like enhancer protein 3 OS=Homo sapiens OX=9606 GN=TLE3 PE=1 SV=1	[F]GAVGFDPHPPMR	12	1xAbu-alpha (N-term) [N-Term]	21	6	2	3	3	0	0	0	24.555	23.6781	23.8838	26.7824	26.6174	26.6409	21.312	22.5636	20.1647	NaN	NaN	20.2737	NaN	17.6541	NaN
RBM12	Q9NTZ6	RNA-binding protein 12 OS=Homo sapiens OX=9606 GN=RBM12 PE=1 SV=1	[A]GLPGAGMPSAGIPSAGGEEHAFLTVGSK	28	1xAbu-alpha (N-term) [N-Term];1xOxidation [M7]	12	5	2	0	0	0	2	3	NaN	NaN	NaN	NaN	NaN	NaN	NaN	NaN	NaN	24.3838	24.3483	24.5914	23.9896	23.8504	24.1347
BRD4	O60885	Bromodomain-containing protein 4 OS=Homo sapiens OX=9606 GN=BRD4 PE=1 SV=2	[M]GSWASLVQK	9	1xAbu-alpha (N-term) [N-Term]	19	5	2	0	0	0	2	3	25.48	24.8171	24.11	NaN	22.7482	21.4398	22.15	22.7573	23.6533	23.1253	23.3734	23.5395	24.7928	24.3012	24.8289
LMO7	E9PMT2	LIM domain only protein 7 OS=Homo sapiens OX=9606 GN=LMO7 PE=1 SV=1	[T]GVATTQSPTPR	11	1xAbu-alpha (N-term) [N-Term]	19	5	2	0	0	0	2	3	24.0558	23.6165	23.8413	NaN	NaN	NaN	NaN	NaN	NaN	20.8904	20.944	20.6905	27.0495	27.0954	27.0147
NUFIP2	Q7Z417	Nuclear fragile X mental retardation-interacting protein 2 OS=Homo sapiens OX=9606 GN=NUFIP2 PE=1 SV=1	[S]FINEPSAGPETVTGK	15	1xAbu-alpha (N-term) [N-Term]	12	5	2	0	0	0	2	3	NaN	NaN	NaN	NaN	NaN	NaN	NaN	NaN	NaN	22.3545	21.9919	NaN	22.1233	NaN	22.1831
UBQLN1	Q9UMX0	Ubiquilin-1 OS=Homo sapiens OX=9606 GN=UBQLN1 PE=1 SV=2	[L]GLNTTNFSELQSQMQR	16	1xAbu-alpha (N-term) [N-Term]	22	5	2	0	2	0	0	3	21.7519	NaN	NaN	25.0481	25.322	25.1225	NaN	NaN	NaN	NaN	NaN	NaN	25.8257	24.511	23.7179
NUP54	Q7Z3B4	Nucleoporin p54 OS=Homo sapiens OX=9606 GN=NUP54 PE=1 SV=2	[T]GLFGGTQNK	9	1xAbu-alpha (N-term) [N-Term]	10	5	2	2	0	0	0	3	24.9366	24.7813	22.6786	NaN	19.0105	21.5994	22.2413	22.2442	22.3708	NaN	NaN	NaN	NaN	NaN	NaN
CDC37L1	Q7L3B6	Hsp90 co-chaperone Cdc37-like 1 OS=Homo sapiens OX=9606 GN=CDC37L1 PE=1 SV=1	[H]GIELACQK	8	1xAbu-alpha (N-term) [N-Term];1xCarbamidomethyl [C6]	12	5	2	2	0	0	0	3	24.8698	24.6739	24.6034	25.6667	NaN	20.1646	NaN	20.6028	23.5325	22.3969	23.9851	21.8381	24.3843	23.4091	24.2966
SEC23IP	A0A0C4DH82	SEC23-interacting protein OS=Homo sapiens OX=9606 GN=SEC23IP PE=1 SV=1	[T]GSQDVSNAFSPSISK	15	1xAbu-alpha (N-term) [N-Term]	14	5	2	0	0	0	3	2	23.8085	23.2018	23.4896	NaN	NaN	NaN	NaN	NaN	NaN	20.0051	19.7438	19.7639	22.2138	22.2742	21.9816
EV70	sp;sp	EV70 EV70_Polyprotein;EV71 EV71_Polyprotein	[Q]MVSTVDFIPPMASLEEK	17	1xAbu-alpha (N-term) [N-Term]	16	5	2	0	0	0	3	2	NaN	NaN	NaN	NaN	17.9131	NaN	NaN	NaN	NaN	26.0857	25.8273	25.7661	24.0496	23.8592	24.0421
PCBP2	F8VZX2;Q15366	Poly(rC)-binding protein 2 OS=Homo sapiens OX=9606 GN=PCBP2 PE=1 SV=1;Poly(rC)-binding protein 2 OS=Homo sapiens OX=9606 GN=PCBP2 PE=1 SV=1	[S]GIESSSPEVK	10	1xAbu-alpha (N-term) [N-Term]	17	5	2	0	0	0	3	2	19.6409	19.8542	NaN	21.1403	NaN	NaN	NaN	NaN	NaN	20.5186	20.0053	20.0807	23.599	23.6654	23.6843
RC3H1	Q5TC82	Roquin-1 OS=Homo sapiens OX=9606 GN=RC3H1 PE=1 SV=1	[Q]GAGPMQAMAPQGAPTK	16	1xAbu-alpha (N-term) [N-Term]	9	5	3	0	0	1	2	2	NaN	NaN	NaN	20.6198	21.1098	NaN	22.85	23.015	22.6956	22.438	22.3457	22.0425	22.4836	22.9268	22.7357
EIF4G2	P78344	Eukaryotic translation initiation factor 4 gamma 2 OS=Homo sapiens OX=9606 GN=EIF4G2 PE=1 SV=1	[A]GNSEFLGK	8	1xAbu-alpha (N-term) [N-Term]	22	5	3	1	0	0	2	2	24.6961	24.2621	25.6487	NaN	NaN	NaN	25.6846	25.6129	25.6319	NaN	NaN	NaN	NaN	NaN	NaN
SLC30A1	Q9Y6M5	Zinc transporter 1 OS=Homo sapiens OX=9606 GN=SLC30A1 PE=1 SV=3	[G]TLPQAPSGK	9	1xAbu-alpha (N-term) [N-Term]	8	5	2	0	0	3	0	2	21.0439	20.8675	NaN	20.8755	20.9556	21.062	24.5741	23.9553	23.961	NaN	20.4803	21.572	21.4465	NaN	21.5918
AMBRA1	A0A075B6T1	Activating molecule in BECN1-regulated autophagy protein 1 OS=Homo sapiens OX=9606 GN=AMBRA1 PE=1 SV=1	[M]GGFGNNIIVSHR	12	1xAbu-alpha (N-term) [N-Term]	13	5	3	1	0	2	0	2	22.7218	22.1996	19.6489	NaN	NaN	NaN	23.8113	23.6374	23.7867	21.2731	21.4386	20.7527	21.2841	21.1367	21.1132
NUP54	Q7Z3B4	Nucleoporin p54 OS=Homo sapiens OX=9606 GN=NUP54 PE=1 SV=2	[L]GGLFSQPTQAPTQSNQLINTASALSAPTLLGDER	34	1xAbu-alpha (N-term) [N-Term]	12	5	3	1	2	0	0	2	20.9402	NaN	NaN	23.3879	23.8968	23.3202	NaN	NaN	NaN	NaN	NaN	NaN	24.4097	24.2295	24.346
GGA3	J3KSS7	ADP-ribosylation factor-binding protein GGA3 OS=Homo sapiens OX=9606 GN=GGA3 PE=1 SV=1	[T]GVAPALAPK	9	1xAbu-alpha (N-term) [N-Term]	18	5	2	3	0	0	0	2	24.7448	23.984	24.3854	NaN	NaN	NaN	21.3981	23.1247	21.4927	24.2954	24.1671	23.8477	23.9606	23.9861	24.1259
SEC31A	D6REX3	Protein transport protein Sec31A OS=Homo sapiens OX=9606 GN=SEC31A PE=1 SV=1	[T]GMPPSFSKPNIEGAPGAPIGNTFQHVQSLPTK	32	1xAbu-alpha (N-term) [N-Term]	22	5	2	3	0	0	0	2	28.1227	27.4879	26.8292	NaN	NaN	NaN	NaN	NaN	NaN	23.0376	20.0584	22.8098	24.1881	22.9334	23.012
CNOT4	A0A0A0MRD2	CCR4-NOT transcription complex subunit 4 OS=Homo sapiens OX=9606 GN=CNOT4 PE=1 SV=1	[T]GLGGIPVAGIPASSGNSLDSLQDDNPPHWLK	31	1xAbu-alpha (N-term) [N-Term]	10	5	2	3	0	0	0	2	25.8852	25.1416	24.8711	NaN	NaN	NaN	NaN	NaN	NaN	NaN	NaN	NaN	24.3977	24.1634	24.4495
RBM14	Q96PK6	RNA-binding protein 14 OS=Homo sapiens OX=9606 GN=RBM14 PE=1 SV=2	[A]NSTPPPYER	9	1xAbu-alpha (N-term) [N-Term]	16	5	2	3	0	0	0	2	21.7079	22.0936	21.738	NaN	NaN	NaN	NaN	NaN	NaN	20.144	19.5755	19.5287	20.0421	20.9883	20.3894
EPB41L1	A0A0C4DH22	Band 4.1-like protein 1 OS=Homo sapiens OX=9606 GN=EPB41L1 PE=1 SV=1	[Y]GATAETLSTSTTTHVTK	17	1xAbu-alpha (N-term) [N-Term]	14	5	2	3	0	0	0	2	24.2001	23.3239	23.7913	19.8829	18.7225	19.8478	NaN	NaN	NaN	NaN	NaN	NaN	23.8726	23.6777	23.9339
DDX17	A0A1W2PQ51	Probable ATP-dependent RNA helicase DDX17 OS=Homo sapiens OX=9606 GN=DDX17 PE=1 SV=1	[G]TYGASSTTSTGR	12	1xAbu-alpha (N-term) [N-Term]	7	5	2	3	0	0	0	2	23.7058	23.1191	23.1009	NaN	NaN	NaN	NaN	NaN	NaN	18.5023	NaN	NaN	17.4237	19.3104	18.7868
TLE3	H0YKT5	Transducin-like enhancer protein 3 OS=Homo sapiens OX=9606 GN=TLE3 PE=1 SV=1	[T]GLPSSLASIPGGKPAYSFHVSADGQMQPVPFPHDALAGPGIPR	43	1xAbu-alpha (N-term) [N-Term]	5	5	2	3	0	0	0	2	24.7592	22.7535	21.3817	NaN	NaN	NaN	NaN	NaN	NaN	NaN	NaN	NaN	24.157	24.2185	23.9416
ZNF106	Q9H2Y7	Zinc finger protein 106 OS=Homo sapiens OX=9606 GN=ZNF106 PE=1 SV=1	[H]GSVPAPDSSVQIK	13	1xAbu-alpha (N-term) [N-Term]	14	5	2	3	0	0	0	2	23.9627	23.4127	23.195	22.8335	21.4805	21.7184	NaN	NaN	NaN	21.9929	21.64	19.5229	23.6807	23.798	23.5872
TNRC6B	H0Y720	Trinucleotide repeat-containing gene 6B protein (Fragment) OS=Homo sapiens OX=9606 GN=TNRC6B PE=1 SV=1	[T]GWGQTQIK	8	1xAbu-alpha (N-term) [N-Term]	18	5	2	3	0	0	0	2	25.7083	25.1976	24.9234	23.1078	22.8568	23.0054	23.8307	23.9477	24.0545	24.2035	24.3408	20.1597	24.877	23.0007	24.8541
PRPF40A	F5H578	Pre-mRNA-processing factor 40 homolog A (Fragment) OS=Homo sapiens OX=9606 GN=PRPF40A PE=1 SV=1	[N]SMDVAAGTASGAK	13	1xAbu-alpha (N-term) [N-Term]	17	5	3	0	1	0	3	1	NaN	NaN	NaN	21.1436	21.5667	21.7797	20.014	NaN	21.3028	20.309	20.307	19.6085	18.817	19.4105	19.6326
SPATS2	Q86XZ4	Spermatogenesis-associated serine-rich protein 2 OS=Homo sapiens OX=9606 GN=SPATS2 PE=1 SV=1	[Q]SAPSQAPGNTIER	13	1xAbu-alpha (N-term) [N-Term]	25	5	3	0	0	2	2	1	NaN	NaN	NaN	20.4997	NaN	NaN	22.3986	22.7761	22.7936	23.522	23.6095	23.1423	20.6129	20.0751	20.652
ZNF703	Q9H7S9	Zinc finger protein 703 OS=Homo sapiens OX=9606 GN=ZNF703 PE=1 SV=1	[Y]GFMLQNEPLPHSCNWVAASGPCDK	24	1xAbu-alpha (N-term) [N-Term];2xCarbamidomethyl [C13;C22]	11	5	4	1	0	1	2	1	24.2543	NaN	NaN	NaN	NaN	NaN	NaN	NaN	NaN	NaN	21.6508	NaN	21.984	21.8022	21.8542
OTUD3	Q5T2D3	OTU domain-containing protein 3 OS=Homo sapiens OX=9606 GN=OTUD3 PE=1 SV=1	[P]LWEEGGSGAR	10	1xAbu-alpha (N-term) [N-Term]	15	5	3	2	0	0	2	1	24.3233	23.8296	NaN	21.5476	20.8283	NaN	23.5537	23.6742	22.4644	22.2332	22.4035	22.1397	22.8888	22.5505	23.0598
E2F4	Q16254	Transcription factor E2F4 OS=Homo sapiens OX=9606 GN=E2F4 PE=1 SV=2	[Q]GMAGPAAEITVSGGPGTDSK	20	1xAbu-alpha (N-term) [N-Term]	20	5	4	0	1	2	1	1	NaN	NaN	NaN	NaN	20.7803	NaN	25.0458	24.8916	24.7364	NaN	NaN	NaN	NaN	NaN	NaN
PABPC4	Q13310;H0Y6X6	Polyadenylate-binding protein 4 OS=Homo sapiens OX=9606 GN=PABPC4 PE=1 SV=1;Polyadenylate-binding protein 4 (Fragment) OS=Homo sapiens OX=9606 GN=PABPC4 PE=1 SV=1	[Q]GLTDSCQSGGVPTAVQNLAPR	21	1xAbu-alpha (N-term) [N-Term];1xCarbamidomethyl [C6]	20	5	4	1	0	2	1	1	23.7081	21.8746	19.5838	20.849	NaN	20.7694	24.0092	21.8641	24.6945	26.7303	26.7691	26.8175	NaN	NaN	19.2853
TPT1	Q5W0H4	Translationally-controlled tumor protein OS=Homo sapiens OX=9606 GN=TPT1 PE=1 SV=1	[-]MIIYRDLISHDEMFSDI	17	1xAbu-alpha (N-term) [N-Term]	13	5	4	2	0	1	1	1	22.9525	22.6162	23.5575	NaN	NaN	NaN	20.3638	22.2848	NaN	NaN	23.2336	21.0295	NaN	20.3514	NaN
S100A6	P06703	Protein S100-A6 OS=Homo sapiens OX=9606 GN=S100A6 PE=1 SV=1	[-]MACPLDQAIGLLVAIFHK	18	1xAbu-alpha (N-term) [N-Term];1xCarbamidomethyl [C3]	10	5	3	0	1	3	0	1	NaN	NaN	NaN	NaN	NaN	NaN	22.1127	22.5373	NaN	NaN	NaN	NaN	20.2448	NaN	NaN
NUP98	A0A3B3ITD8	Nuclear pore complex protein Nup98-Nup96 OS=Homo sapiens OX=9606 GN=NUP98 PE=1 SV=1	[N]GKPAPPPQSQSPEVEQLGR	19	1xAbu-alpha (N-term) [N-Term]	17	5	3	1	0	3	0	1	NaN	NaN	NaN	NaN	NaN	NaN	22.8325	23.5143	23.8466	NaN	NaN	NaN	NaN	NaN	NaN
MAPKAPK3	Q16644	MAP kinase-activated protein kinase 3 OS=Homo sapiens OX=9606 GN=MAPKAPK3 PE=1 SV=1	[Q]GGPVPPPVAPGGPGLGGAPGGRREPK	26	1xAbu-alpha (N-term) [N-Term]	30	5	3	0	2	2	0	1	NaN	NaN	NaN	26.3761	26.1898	26.3131	25.4273	26.0076	26.1524	21.9709	23.5246	NaN	25.2207	24.9656	24.4992
PLIN3	O60664	Perilipin-3 OS=Homo sapiens OX=9606 GN=PLIN3 PE=1 SV=3	[D]MVSAAYASTK	10	1xAbu-alpha (N-term) [N-Term]	13	5	3	0	2	2	0	1	NaN	19.9503	NaN	25.6428	25.6746	25.7474	22.6773	23.2271	23.0139	NaN	NaN	19.2495	21.4819	19.0941	20.1086
PRKCSH	K7ELL7	Glucosidase 2 subunit beta OS=Homo sapiens OX=9606 GN=PRKCSH PE=1 SV=1	[Q]ALLSGDTQTDATSFYDRVWAAIRDK	25	1xAbu-alpha (N-term) [N-Term]	20	5	3	0	2	2	0	1	21.055	NaN	NaN	22.7989	23.6123	22.7866	24.0455	24.5471	23.6888	24.5505	25.1798	23.4406	22.7383	24.1013	24.138
ATP2B1	P20020	Plasma membrane calcium-transporting ATPase 1 OS=Homo sapiens OX=9606 GN=ATP2B1 PE=1 SV=4	[F]MTHPEFR	7	1xAbu-alpha (N-term) [N-Term]	17	5	4	1	2	1	0	1	23.1793	21.7555	18.3975	22.6358	22.3112	22.7754	24.2903	24.236	23.9879	21.5496	21.2384	20.3023	20.6803	21.2318	20.71
SCRIB	A0A0G2JPP5	Protein scribble homolog OS=Homo sapiens OX=9606 GN=SCRIB PE=1 SV=1	[Q]GSLSETWSDAPPSR	14	1xAbu-alpha (N-term) [N-Term]	14	5	2	0	0	2	3	0	NaN	NaN	NaN	NaN	NaN	NaN	23.0598	22.8454	22.7433	21.0339	21.451	21.1179	NaN	NaN	NaN
TMPO	P42166	Lamina-associated polypeptide 2, isoform alpha OS=Homo sapiens OX=9606 GN=TMPO PE=1 SV=2	[T]AASPSLIK	8	1xAbu-alpha (N-term) [N-Term]	17	5	2	0	0	2	3	0	23.322	20.2714	22.1514	22.1206	21.9887	21.6593	25.4677	25.3307	25.54	23.144	23.2024	22.7564	NaN	NaN	NaN
SNRPA	P09012	U1 small nuclear ribonucleoprotein A OS=Homo sapiens OX=9606 GN=SNRPA PE=1 SV=3	[Q]GPVPGMPPMTQAPR	14	1xAbu-alpha (N-term) [N-Term]	24	5	2	0	0	2	3	0	21.5342	NaN	NaN	24.7463	24.0895	24.0407	25.9675	26.1857	24.8151	25.3498	25.5063	25.2511	24.1102	24.4051	24.3905
SPAG7	I3L4C3	Sperm-associated antigen 7 OS=Homo sapiens OX=9606 GN=SPAG7 PE=1 SV=1	[V]VVSPASDYK	9	1xAbu-alpha (N-term) [N-Term]	19	5	2	0	0	2	3	0	20.5082	20.694	21.3362	NaN	21.9305	22.806	24.6628	24.5921	24.8178	22.1587	22.3037	22.5246	19.4201	NaN	NaN
PRPF4B	Q13523	Serine/threonine-protein kinase PRP4 homolog OS=Homo sapiens OX=9606 GN=PRPF4B PE=1 SV=3	[Q]SLREQPEMEDANSEK	15	1xAbu-alpha (N-term) [N-Term]	18	5	2	0	0	2	3	0	NaN	NaN	NaN	NaN	NaN	NaN	25.2955	26.1162	26.0221	23.5808	23.9039	23.1974	NaN	NaN	NaN
WAC	Q9BTA9	WW domain-containing adapter protein with coiled-coil OS=Homo sapiens OX=9606 GN=WAC PE=1 SV=3	[Q]GPVSQSATQQPVTADK	16	1xAbu-alpha (N-term) [N-Term]	20	5	2	0	0	2	3	0	NaN	NaN	NaN	NaN	NaN	NaN	22.3447	22.4648	23.2529	21.939	21.9632	21.5158	NaN	18.991	18.5332
EIF2A	Q9BY44	Eukaryotic translation initiation factor 2A OS=Homo sapiens OX=9606 GN=EIF2A PE=1 SV=3	[Q]AVPSEVPNEEPK	12	1xAbu-alpha (N-term) [N-Term]	15	5	2	0	0	2	3	0	NaN	NaN	NaN	NaN	NaN	NaN	23.871	24.0405	23.5676	20.9245	20.1518	20.1282	NaN	NaN	NaN
UNG	P13051	Uracil-DNA glycosylase OS=Homo sapiens OX=9606 GN=UNG PE=1 SV=2	[Q]GTGVAGVPEESGDAAAIPAK	20	1xAbu-alpha (N-term) [N-Term]	16	5	2	0	0	2	3	0	NaN	NaN	NaN	NaN	NaN	NaN	23.9588	25.1358	24.4283	18.9721	20.8853	20.1449	NaN	NaN	NaN
POLDIP3	Q9BY77	Polymerase delta-interacting protein 3 OS=Homo sapiens OX=9606 GN=POLDIP3 PE=1 SV=2	[Q]GLLSQSTR	8	1xAbu-alpha (N-term) [N-Term]	18	5	2	0	0	2	3	0	20.4822	19.3623	20.7793	NaN	18.9002	NaN	23.3991	23.452	23.6522	23.4344	23.5816	23.5833	20.3475	NaN	17.8906
RIN1	Q13671	Ras and Rab interactor 1 OS=Homo sapiens OX=9606 GN=RIN1 PE=1 SV=4	[Q]GAVTEEEGSGQSEAR	15	1xAbu-alpha (N-term) [N-Term]	21	5	2	0	0	2	3	0	NaN	NaN	NaN	NaN	NaN	NaN	22.7231	23.0454	23.2852	20.9561	21.2249	20.8726	17.4501	17.9929	17.7884
SPATS2L	Q9NUQ6	SPATS2-like protein OS=Homo sapiens OX=9606 GN=SPATS2L PE=1 SV=2	[Q]GSGNEAEPLGK	11	1xAbu-alpha (N-term) [N-Term]	19	5	2	0	0	2	3	0	21.8573	23.4323	22.6928	19.7124	19.9224	NaN	21.5168	21.8953	22.252	23.0251	22.606	21.788	19.9888	19.3408	20.8874
CHKA	P35790	Choline kinase alpha OS=Homo sapiens OX=9606 GN=CHKA PE=1 SV=3	[S]AAPAPGVGQQR	11	1xAbu-alpha (N-term) [N-Term]	13	5	2	0	0	2	3	0	NaN	NaN	NaN	18.7243	NaN	19.4028	23.3909	23.4915	23.6427	21.8368	22.1321	21.7647	16.8366	NaN	NaN
SF1	Q15637	Splicing factor 1 OS=Homo sapiens OX=9606 GN=SF1 PE=1 SV=4	[P]GHHGPPPMDQYLGSTPVGSGVYR	23	1xAbu-alpha (N-term) [N-Term]	22	5	2	0	0	2	3	0	NaN	NaN	NaN	NaN	NaN	NaN	24.2248	24.7669	24.3031	19.977	22.3787	20.3775	NaN	NaN	NaN
SPAG7	I3L4C3	Sperm-associated antigen 7 OS=Homo sapiens OX=9606 GN=SPAG7 PE=1 SV=1	[Q]GPVVVSPASDYK	12	1xAbu-alpha (N-term) [N-Term]	18	5	3	0	1	1	3	0	NaN	NaN	NaN	21.1785	20.7916	19.8756	23.9287	23.9932	23.8851	22.5826	22.5329	22.0836	20.2774	19.272	18.9483
POM121C	A8CG34;Q96HA1	Nuclear envelope pore membrane protein POM 121C OS=Homo sapiens OX=9606 GN=POM121C PE=1 SV=3;Nuclear envelope pore membrane protein POM 121 OS=Homo sapiens OX=9606 GN=POM121 PE=1 SV=2	[Q]WFNQALEDK	9	1xAbu-alpha (N-term) [N-Term]	15	5	3	0	1	1	3	0	NaN	20.6241	NaN	NaN	NaN	NaN	NaN	NaN	NaN	24.6575	24.7991	24.7154	NaN	NaN	NaN
TACC2	O95359	Transforming acidic coiled-coil-containing protein 2 OS=Homo sapiens OX=9606 GN=TACC2 PE=1 SV=3	[Q]GTESSAVLEK	10	1xAbu-alpha (N-term) [N-Term]	15	5	3	1	0	1	3	0	NaN	NaN	21.1821	23.0602	22.8605	23.0761	22.7291	23.1405	23.2579	22.9721	22.9388	22.6495	NaN	NaN	NaN
IRF2BPL	Q9H1B7;Q7Z5L9	Interferon regulatory factor 2-binding protein-like OS=Homo sapiens OX=9606 GN=IRF2BPL PE=1 SV=1;Interferon regulatory factor 2-binding protein 2 OS=Homo sapiens OX=9606 GN=IRF2BP2 PE=1 SV=2	[Q]GEIATILAGDVK	12	1xAbu-alpha (N-term) [N-Term]	14	5	2	2	0	0	3	0	23.4262	23.164	NaN	19.7601	NaN	21.0245	NaN	21.2126	NaN	24.1055	21.904	23.533	NaN	NaN	NaN
MAP4	P27816;E7EVA0	Microtubule-associated protein 4 OS=Homo sapiens OX=9606 GN=MAP4 PE=1 SV=3;Microtubule-associated protein OS=Homo sapiens OX=9606 GN=MAP4 PE=1 SV=1	[SAD]GIARPEEGRPVVSGTGNDITTPPNK	25	1xAbu-alpha (N-term) [N-Term]	20	5	2	0	0	3	2	0	22.1292	NaN	22.0518	NaN	NaN	NaN	26.7832	27.9281	27.9227	23.9011	24.7899	24.3653	21.2322	NaN	NaN
CREB1	P16220	Cyclic AMP-responsive element-binding protein 1 OS=Homo sapiens OX=9606 GN=CREB1 PE=1 SV=2	[Q]AASGDVQTYQIR	12	1xAbu-alpha (N-term) [N-Term]	17	5	2	0	0	3	2	0	NaN	NaN	NaN	NaN	NaN	NaN	23.4138	24.1524	23.1605	23.085	23.1896	22.8995	NaN	NaN	NaN
TNRC6B	H0Y720	Trinucleotide repeat-containing gene 6B protein (Fragment) OS=Homo sapiens OX=9606 GN=TNRC6B PE=1 SV=1	[S]GFSSGGMDYGMVGGK	15	1xAbu-alpha (N-term) [N-Term]	19	5	2	0	0	3	2	0	20.8295	NaN	NaN	21.5175	21.372	21.3785	24.1692	24.081	24.0738	23.1565	23.3324	23.2842	NaN	NaN	NaN
SRRM2	Q9UQ35	Serine/arginine repetitive matrix protein 2 OS=Homo sapiens OX=9606 GN=SRRM2 PE=1 SV=2	[A]GGSMMDGPGPRIPDHQR	17	1xAbu-alpha (N-term) [N-Term]	17	5	2	0	0	3	2	0	NaN	NaN	NaN	NaN	NaN	NaN	27.468	28.0457	28.1452	23.7974	23.8222	23.1731	NaN	NaN	NaN
SAMD1	E9PIW9	Atherin OS=Homo sapiens OX=9606 GN=SAMD1 PE=1 SV=1	[Q]GLLEEEAAAR	10	1xAbu-alpha (N-term) [N-Term]	19	5	2	0	0	3	2	0	20.1218	22.4711	20.6411	NaN	NaN	19.3263	26.3941	26.2389	26.3535	23.3052	23.5218	23.4319	19.8843	NaN	20.1551
UBXN7	O94888	UBX domain-containing protein 7 OS=Homo sapiens OX=9606 GN=UBXN7 PE=1 SV=2	[Q]GLPAVDSEILEMPPEK	16	1xAbu-alpha (N-term) [N-Term]	24	5	2	0	0	3	2	0	NaN	NaN	NaN	23.7271	NaN	24.0143	23.303	24.6164	23.3677	NaN	19.7235	NaN	19.2477	NaN	NaN
NUFIP2	Q7Z417	Nuclear fragile X mental retardation-interacting protein 2 OS=Homo sapiens OX=9606 GN=NUFIP2 PE=1 SV=1	[Q]GAEIIPSGTEHPVFPK	16	1xAbu-alpha (N-term) [N-Term]	16	5	3	1	0	2	2	0	24.1157	23.7757	24.0534	NaN	NaN	NaN	24.7833	24.9683	24.7965	23.0824	20.2602	21.7353	NaN	NaN	NaN
BCAS3	K7EJU7	Breast carcinoma-amplified sequence 3 (Fragment) OS=Homo sapiens OX=9606 GN=BCAS3 PE=1 SV=1	[Q]AYSGTPLTEEK	11	1xAbu-alpha (N-term) [N-Term]	14	5	2	0	3	0	2	0	NaN	19.6594	NaN	23.597	23.4128	23.5265	21.5118	21.6165	21.5581	22.8214	23.0484	NaN	NaN	NaN	NaN
MATR3	A8MXP9;D6RBS2	Matrin-3 OS=Homo sapiens OX=9606 GN=MATR3 PE=1 SV=1;Matrin-3 (Fragment) OS=Homo sapiens OX=9606 GN=MATR3 PE=1 SV=1	[Q]SLSMPASLGR	10	1xAbu-alpha (N-term) [N-Term];1xOxidation [M4]	14	5	2	0	3	0	2	0	20.9585	NaN	20.7119	26.0251	25.7115	26.2472	25.4762	25.1601	25.8584	23.5985	23.7777	NaN	NaN	NaN	NaN
UBAP2	Q5T6F2	Ubiquitin-associated protein 2 OS=Homo sapiens OX=9606 GN=UBAP2 PE=1 SV=1	[Q]SLSSVLGSGFGELAPPK	17	1xAbu-alpha (N-term) [N-Term]	21	5	2	0	3	0	2	0	NaN	NaN	NaN	23.1018	22.7847	23.102	NaN	NaN	NaN	23.2886	23.1287	23.0889	NaN	NaN	NaN
WNK2	H0Y7R3;H0Y493	Serine/threonine-protein kinase WNK2 (Fragment) OS=Homo sapiens OX=9606 GN=WNK2 PE=1 SV=1;Serine/threonine-protein kinase WNK2 (Fragment) OS=Homo sapiens OX=9606 GN=WNK2 PE=1 SV=1	[C]GLGTGEESR	9	1xAbu-alpha (N-term) [N-Term]	19	5	3	2	1	0	2	0	23.2919	22.4785	22.7334	24.2665	23.3497	23.2307	25.1493	25.1643	25.5623	21.5017	20.8874	NaN	NaN	NaN	NaN
EXTL2	F5GZK1	Exostosin-like 2 OS=Homo sapiens OX=9606 GN=EXTL2 PE=1 SV=2	[T]ALLPSVK	7	1xAbu-alpha (N-term) [N-Term]	16	5	3	0	2	2	1	0	22.855	22.3856	21.2513	25.0021	24.5712	24.9243	24.6004	24.713	24.6391	23.4009	23.4036	NaN	22.3027	22.2462	22.1307
CNBP	P62633	Cellular nucleic acid-binding protein OS=Homo sapiens OX=9606 GN=CNBP PE=1 SV=1	[Q]FVSSSLPDICYR	12	1xAbu-alpha (N-term) [N-Term];1xCarbamidomethyl [C10]	12	5	3	3	0	1	1	0	22.6196	23.1952	20.9159	25.8604	NaN	NaN	21.7914	20.6536	NaN	20.3622	20.4321	22.3348	20.5571	21.8473	21.2012
CDC42EP1	Q00587	Cdc42 effector protein 1 OS=Homo sapiens OX=9606 GN=CDC42EP1 PE=1 SV=1	[G]GGPRGPAGPALGR	13	1xAbu-alpha (N-term) [N-Term]	10	5	2	0	2	3	0	0	NaN	NaN	NaN	22.7786	23.0694	23.3227	23.6484	23.8785	23.9556	20.5178	20.6955	19.7576	19.8904	20.701	20.839
BORCS6	Q96GS4	BLOC-1-related complex subunit 6 OS=Homo sapiens OX=9606 GN=BORCS6 PE=1 SV=2	[Q]ALVFGGGPGR	10	1xAbu-alpha (N-term) [N-Term]	12	5	2	0	2	3	0	0	NaN	NaN	NaN	NaN	NaN	NaN	NaN	NaN	NaN	NaN	NaN	NaN	NaN	NaN	NaN
DCUN1D5	E9PQV9	DCN1-like protein OS=Homo sapiens OX=9606 GN=DCUN1D5 PE=1 SV=1	[A]AVAEDGGLK	9	1xAbu-alpha (N-term) [N-Term]	10	5	2	0	2	3	0	0	20.7767	22.1177	20.8149	24.3612	24.0092	24.3815	25.12	25.1989	25.7676	23.6402	23.5142	23.1728	22.8774	22.8554	23.4922
DCP1A	Q9NPI6	mRNA-decapping enzyme 1A OS=Homo sapiens OX=9606 GN=DCP1A PE=1 SV=3	[L]GSTETLEEMPSGSQDK	16	1xAbu-alpha (N-term) [N-Term]	13	5	2	0	2	3	0	0	NaN	NaN	NaN	21.519	21.1667	21.6863	22.3458	22.2687	22.8303	NaN	NaN	NaN	NaN	NaN	NaN
HOXA10	Q5I0Y5	HOXA10 protein OS=Homo sapiens OX=9606 GN=HOXA10 PE=1 SV=1	[C]GLFPTLGGK	9	1xAbu-alpha (N-term) [N-Term]	14	5	2	0	2	3	0	0	NaN	NaN	NaN	22.5096	21.6195	22.0726	24.8979	24.6326	24.9278	23.695	19.8016	23.3271	NaN	19.1049	20.5729
CSTF2T	Q9H0L4	Cleavage stimulation factor subunit 2 tau variant OS=Homo sapiens OX=9606 GN=CSTF2T PE=1 SV=1	[Q]GVSIQGGGIQGGGIQGASK	19	1xAbu-alpha (N-term) [N-Term]	13	5	3	1	1	3	0	0	21.1957	21.5293	NaN	NaN	NaN	NaN	23.0009	24.1031	23.1874	NaN	19.195	20.1872	NaN	NaN	NaN
BCL9L	Q86UU0	B-cell CLL/lymphoma 9-like protein OS=Homo sapiens OX=9606 GN=BCL9L PE=1 SV=1	[M]GSPGMGHLK	9	1xAbu-alpha (N-term) [N-Term]	19	5	2	2	0	3	0	0	21.8839	22.072	21.0551	19.904	19.3484	19.3913	24.8338	25.1504	25.439	NaN	NaN	NaN	21.0558	20.0025	18.3308
FAM98B	Q52LJ0	Protein FAM98B OS=Homo sapiens OX=9606 GN=FAM98B PE=1 SV=1	[-]MRGPEPGPQPTMEGDVLDTLEALGYK	26	1xAbu-alpha (N-term) [N-Term]	10	5	2	2	0	3	0	0	25.2867	NaN	23.2931	23.9885	NaN	NaN	25.4053	25.2972	25.0413	NaN	NaN	NaN	NaN	NaN	NaN
SP3	H0Y7L6	Transcription factor Sp3 (Fragment) OS=Homo sapiens OX=9606 GN=SP3 PE=1 SV=1	[T]GQAMDSSDNSER	12	1xAbu-alpha (N-term) [N-Term]	10	5	2	3	0	2	0	0	23.8039	23.7259	24.069	NaN	NaN	NaN	21.8105	22.0978	22.1097	NaN	NaN	NaN	NaN	NaN	NaN
CSTF2	E7EWR4	Cleavage stimulation factor subunit 2 OS=Homo sapiens OX=9606 GN=CSTF2 PE=1 SV=1	[G]SLPANVPTPR	10	1xAbu-alpha (N-term) [N-Term]	11	5	2	3	0	2	0	0	23.2372	24.0736	23.9007	NaN	NaN	NaN	24.6212	24.544	23.6945	NaN	NaN	21.5141	NaN	NaN	NaN
NOTCH2	Q04721	Neurogenic locus notch homolog protein 2 OS=Homo sapiens OX=9606 GN=NOTCH2 PE=1 SV=3	[K]YCADHFK	7	1xAbu-alpha (N-term) [N-Term];1xCarbamidomethyl [C2]	10	5	2	3	0	2	0	0	23.6043	23.5265	22.8592	NaN	NaN	NaN	22.3591	22.8712	23.0902	NaN	NaN	NaN	NaN	NaN	NaN
KCTD15	K7EPF0	BTB/POZ domain-containing protein KCTD15 (Fragment) OS=Homo sapiens OX=9606 GN=KCTD15 PE=1 SV=1	[H]GSTGTAEGGNMSR	13	1xAbu-alpha (N-term) [N-Term]	10	5	2	3	0	2	0	0	NaN	NaN	NaN	NaN	NaN	NaN	19.6959	19.8132	20.2656	NaN	NaN	NaN	NaN	NaN	NaN
HSPA1B	A0A0G2JIW1	Heat shock 70 kDa protein 1B OS=Homo sapiens OX=9606 GN=HSPA1B PE=1 SV=1	[Q]GAGGPGPGGFGAQGPK	16	1xAbu-alpha (N-term) [N-Term]	11	5	2	2	3	0	0	0	22.8367	22.9765	20.5477	24.6367	24.9392	25.1222	20.2376	20.0353	19.9024	NaN	NaN	NaN	NaN	NaN	NaN
DNAJB6	A0A0J9YX62	DnaJ homolog subfamily B member 6 OS=Homo sapiens OX=9606 GN=DNAJB6 PE=1 SV=1	[F]GSLGHGGLTSFSSTSFGGSGMGNFK	25	1xAbu-alpha (N-term) [N-Term]	8	5	2	2	3	0	0	0	24.4496	24.4394	24.0545	25.0385	25.256	24.7883	NaN	NaN	NaN	NaN	NaN	NaN	NaN	NaN	NaN
NUP214	P35658	Nuclear pore complex protein Nup214 OS=Homo sapiens OX=9606 GN=NUP214 PE=1 SV=2	[F]GGFASSSFGEQKPTGTFSSGGGSVASQGFGFSSPNK	36	1xAbu-alpha (N-term) [N-Term]	8	5	2	2	3	0	0	0	24.6035	23.5934	23.5406	25.9204	26.0694	26.2313	NaN	NaN	NaN	NaN	NaN	NaN	NaN	NaN	NaN
COBLL1	Q53SF7	Cordon-bleu protein-like 1 OS=Homo sapiens OX=9606 GN=COBLL1 PE=1 SV=2	[F]GAPRPYSSSGPSPFALAVVK	20	1xAbu-alpha (N-term) [N-Term]	10	5	2	2	3	0	0	0	23.2069	22.6887	NaN	24.8632	24.6773	24.9292	NaN	NaN	NaN	NaN	NaN	NaN	NaN	NaN	NaN
NUP98	A0A3B3ITD8	Nuclear pore complex protein Nup98-Nup96 OS=Homo sapiens OX=9606 GN=NUP98 PE=1 SV=1	[L]GTGLGAGFGTALGAGQASLFGNNQPK	26	1xAbu-alpha (N-term) [N-Term]	9	5	2	3	2	0	0	0	24.2748	23.7545	22.3585	21.6747	22.4753	23.4975	NaN	NaN	20.8365	NaN	NaN	NaN	NaN	NaN	NaN
SMAD4	K7ES96	Mothers against decapentaplegic homolog 4 OS=Homo sapiens OX=9606 GN=SMAD4 PE=1 SV=1	[N]GFTGQPATYHHNSTTTWTGSR	21	1xAbu-alpha (N-term) [N-Term]	13	4	2	0	0	0	1	3	22.961	22.2957	21.385	24.744	24.5365	25.0625	23.9944	24.3033	23.2223	21.9108	22.7495	21.3642	25.1778	24.1793	24.7476
AHDC1	Q5TGY3	AT-hook DNA-binding motif-containing protein 1 OS=Homo sapiens OX=9606 GN=AHDC1 PE=1 SV=1	[T]GAPSGQTELSQER	13	1xAbu-alpha (N-term) [N-Term]	11	4	2	0	0	0	1	3	22.2965	NaN	NaN	NaN	NaN	NaN	NaN	NaN	NaN	20.1116	20.3642	19.9836	20.6219	19.4466	20.497
NUDC	Q9Y266	Nuclear migration protein nudC OS=Homo sapiens OX=9606 GN=NUDC PE=1 SV=1	[M]GLPTSDEQK	9	1xAbu-alpha (N-term) [N-Term]	23	4	2	0	0	1	0	3	22.3596	21.4784	19.7117	22.601	22.9292	23.1048	23.3301	23.5027	23.032	22.9664	23.2697	22.9134	28.1144	28.5233	28.3125
PARP1	P09874	Poly [ADP-ribose] polymerase 1 OS=Homo sapiens OX=9606 GN=PARP1 PE=1 SV=4	[N]SSASADKPLSNMK	13	1xAbu-alpha (N-term) [N-Term]	14	4	2	0	0	1	0	3	26.9169	26.4545	26.8838	NaN	NaN	NaN	23.6561	24.2537	24.3518	22.8767	23.0065	28.4781	NaN	NaN	NaN
TINF2	B4DFJ1	cDNA FLJ53728, highly similar to TERF1-interacting nuclear factor 2 OS=Homo sapiens OX=9606 GN=TINF2 PE=1 SV=1	[L]GSPTQVISKPESK	13	1xAbu-alpha (N-term) [N-Term]	8	4	2	1	0	0	0	3	23.7387	22.8898	22.833	NaN	NaN	NaN	NaN	NaN	NaN	20.084	NaN	NaN	23.1251	22.9291	23.169
ARHGAP42	E9PJK4	Rho GTPase-activating protein 42 OS=Homo sapiens OX=9606 GN=ARHGAP42 PE=1 SV=1	[N]GYQRPGSVVAAK	12	1xAbu-alpha (N-term) [N-Term]	10	4	2	0	0	0	2	2	21.5953	21.4196	21.3877	NaN	NaN	NaN	18.1956	18.9787	18.5969	21.4566	21.3838	21.2278	21.0305	20.6544	21.2857
MRTFB	Q9ULH7	Myocardin-related transcription factor B OS=Homo sapiens OX=9606 GN=MRTFB PE=1 SV=3	[Q]GSSVTSVQLPVGSLK	15	1xAbu-alpha (N-term) [N-Term]	14	4	2	0	0	0	2	2	NaN	NaN	NaN	NaN	NaN	NaN	21.8602	23.0724	NaN	23.5601	23.6173	23.6736	21.593	20.7782	21.1074
SPATS2	Q86XZ4	Spermatogenesis-associated serine-rich protein 2 OS=Homo sapiens OX=9606 GN=SPATS2 PE=1 SV=1	[Q]GGAFENMK	8	1xAbu-alpha (N-term) [N-Term]	11	4	2	0	0	0	2	2	NaN	NaN	NaN	NaN	NaN	NaN	NaN	NaN	NaN	NaN	NaN	NaN	22.008	22.3389	22.1967
RBM14	Q96PK6	RNA-binding protein 14 OS=Homo sapiens OX=9606 GN=RBM14 PE=1 SV=2	[Q]GAVANANSTPPPYER	15	1xAbu-alpha (N-term) [N-Term]	12	4	2	0	0	0	2	2	NaN	NaN	NaN	NaN	NaN	NaN	NaN	NaN	NaN	20.5592	20.769	21.3231	NaN	NaN	20.3337
ALKBH3	E9PSA5	Alpha-ketoglutarate-dependent dioxygenase alkB homolog 3 (Fragment) OS=Homo sapiens OX=9606 GN=ALKBH3 PE=1 SV=1	[Q]GAWAAPVK	8	1xAbu-alpha (N-term) [N-Term]	18	4	2	0	0	0	2	2	NaN	NaN	22.1803	22.9727	22.494	22.9845	25.5298	25.3768	25.6654	22.3921	23.5131	23.2784	22.6307	20.9613	22.1442
SENP3	Q9H4L4	Sentrin-specific protease 3 OS=Homo sapiens OX=9606 GN=SENP3 PE=1 SV=2	[N]GFGGQSGPEGER	12	1xAbu-alpha (N-term) [N-Term]	11	4	2	0	0	0	2	2	NaN	NaN	NaN	NaN	NaN	NaN	NaN	NaN	NaN	20.1686	20.4415	20.2494	20.1245	19.7382	20.9397
PALLD	A0A3B3ISX8	Palladin (Fragment) OS=Homo sapiens OX=9606 GN=PALLD PE=1 SV=1	[P]ASGHGTPASSPSSSSLPSPMSPTPR	25	1xAbu-alpha (N-term) [N-Term]	16	4	2	0	0	2	0	2	20.8829	NaN	20.9967	21.2426	20.1024	20.3864	23.4887	24.6578	24.5367	NaN	NaN	NaN	NaN	NaN	NaN
PRMT1	Q99873	Protein arginine N-methyltransferase 1 OS=Homo sapiens OX=9606 GN=PRMT1 PE=1 SV=3	[M]AAAEAANCIMENFVATLANGMSLQPPLEEVSC	32	1xAbu-alpha (N-term) [N-Term];1xOxidation [M21];2xCarbamidomethyl [C8;C32]	5	4	2	0	0	2	0	2	NaN	NaN	NaN	NaN	NaN	NaN	NaN	NaN	NaN	NaN	NaN	NaN	NaN	NaN	NaN
PSPC1	Q8WXF1	Paraspeckle component 1 OS=Homo sapiens OX=9606 GN=PSPC1 PE=1 SV=1	[N]GAVHNDRFPQGPPSQMGSPMGSR	23	1xAbu-alpha (N-term) [N-Term]	11	4	3	0	1	1	0	2	NaN	NaN	NaN	NaN	NaN	NaN	NaN	NaN	NaN	21.4473	21.9956	20.9133	21.4647	NaN	21.2638
DDX6	P26196	Probable ATP-dependent RNA helicase DDX6 OS=Homo sapiens OX=9606 GN=DDX6 PE=1 SV=2	[T]GGPGGGGTQTQQQMNQLK	18	1xAbu-alpha (N-term) [N-Term]	19	4	2	2	0	0	0	2	23.7194	23.1178	23.2699	NaN	NaN	NaN	NaN	NaN	NaN	NaN	NaN	NaN	23.3894	23.2435	23.2415
MISP	Q8IVT2	Mitotic interactor and substrate of PLK1 OS=Homo sapiens OX=9606 GN=MISP PE=1 SV=1	[H]AYTGQPSPR	9	1xAbu-alpha (N-term) [N-Term]	5	4	2	2	0	0	0	2	23.1558	24.0655	NaN	NaN	NaN	NaN	NaN	NaN	NaN	19.7332	19.9455	22.88	NaN	22.9653	22.4159
KRT18	P05783	Keratin, type I cytoskeletal 18 OS=Homo sapiens OX=9606 GN=KRT18 PE=1 SV=2	[D]SSNSMQTIQK	10	1xAbu-alpha (N-term) [N-Term]	11	4	2	2	0	0	0	2	NaN	NaN	NaN	NaN	NaN	19.3033	19.5154	19.0803	20.3741	20.3976	NaN	18.021	21.7367	21.2922	21.77
INF2	Q27J81	Inverted formin-2 OS=Homo sapiens OX=9606 GN=INF2 PE=1 SV=2	[D]AVTPGPQPTLEQLEEGGPRPLER	23	1xAbu-alpha (N-term) [N-Term]	23	4	2	2	0	0	0	2	23.5508	23.0748	24.0244	NaN	NaN	NaN	NaN	NaN	NaN	NaN	19.4558	NaN	24.4622	23.772	24.5511
HLTF	Q14527	Helicase-like transcription factor OS=Homo sapiens OX=9606 GN=HLTF PE=1 SV=2	[L]GFNLESGWGSGR	12	1xAbu-alpha (N-term) [N-Term]	13	4	2	2	0	0	0	2	23.7545	22.9756	23.9386	NaN	NaN	NaN	NaN	NaN	NaN	22.7127	21.4689	19.0484	24.6049	24.4583	24.4301
TCF3	P15923	Transcription factor E2-alpha OS=Homo sapiens OX=9606 GN=TCF3 PE=1 SV=1	[A]GFLSGELALNSPGPLSPSGMK	21	1xAbu-alpha (N-term) [N-Term]	23	4	2	0	0	0	3	1	NaN	19.9938	NaN	NaN	NaN	NaN	20.5693	23.8781	20.2054	23.426	23.4122	23.3684	18.5945	NaN	19.8976
SMARCD3	Q6STE5	SWI/SNF-related matrix-associated actin-dependent regulator of chromatin subfamily D member 3 OS=Homo sapiens OX=9606 GN=SMARCD3 PE=1 SV=1	[Q]GQPVPTAPAR	10	1xAbu-alpha (N-term) [N-Term]	15	4	3	0	0	1	2	1	23.572	22.3835	22.0027	NaN	NaN	NaN	23.981	NaN	24.0728	22.9342	23.2736	22.717	22.646	22.1592	22.5177
MAPKAPK3	Q16644	MAP kinase-activated protein kinase 3 OS=Homo sapiens OX=9606 GN=MAPKAPK3 PE=1 SV=1	[Q]GGPVPPPVAPGGPGLGGAPGGR	22	1xAbu-alpha (N-term) [N-Term]	28	4	3	0	2	0	1	1	NaN	NaN	NaN	24.9826	24.9851	25.3056	NaN	NaN	NaN	NaN	20.657	NaN	24.6471	24.4012	24.9064
UBXN1	Q04323	UBX domain-containing protein 1 OS=Homo sapiens OX=9606 GN=UBXN1 PE=1 SV=2	[Q]GGLEGSGSAAGEGKPALSEEERQEQTK	27	1xAbu-alpha (N-term) [N-Term]	18	4	3	0	2	0	1	1	19.6605	NaN	NaN	NaN	23.4187	24.0981	NaN	22.3775	22.6444	21.864	NaN	20.9722	NaN	NaN	NaN
OGA	O60502	Protein O-GlcNAcase OS=Homo sapiens OX=9606 GN=OGA PE=1 SV=2	[Q]GAALSGEPTTLTK	13	1xAbu-alpha (N-term) [N-Term]	15	4	2	0	0	3	0	1	NaN	NaN	NaN	NaN	NaN	NaN	25.5186	25.689	25.9248	21.0249	20.9372	21.2203	20.4645	19.1183	20.741
RAD23B	P54727	UV excision repair protein RAD23 homolog B OS=Homo sapiens OX=9606 GN=RAD23B PE=1 SV=1	[Q]GGGGGGGSGGIAEAGSGHMNYIQVTPQEK	29	1xAbu-alpha (N-term) [N-Term]	15	4	3	0	1	2	0	1	NaN	NaN	NaN	NaN	NaN	NaN	23.1841	23.0234	NaN	22.6767	22.7733	22.3731	22.4373	21.9505	22.3022
YME1L1	Q96I63	ATP-dependent zinc metalloprotease YME1L1 OS=Homo sapiens OX=9606 GN=YME1L1 PE=1 SV=1	[K]NVTFEHVK	8	1xAbu-alpha (N-term) [N-Term]	12	4	3	1	0	2	0	1	23.629	21.2143	22.8993	NaN	20.9479	21.4803	25.6098	25.6272	26.1005	23.5207	23.3106	NaN	23.2341	23.4642	23.4355
EHBP1L1	Q8N3D4	EH domain-binding protein 1-like protein 1 OS=Homo sapiens OX=9606 GN=EHBP1L1 PE=1 SV=2	[V]ASGAGAGAPRASSPEK	16	1xAbu-alpha (N-term) [N-Term]	11	4	3	1	0	2	0	1	NaN	NaN	NaN	NaN	NaN	NaN	NaN	NaN	NaN	NaN	NaN	NaN	NaN	NaN	NaN
PV	sp	PV PV_Polyprotein	[Q]GEIQWMRPSK	10	1xAbu-alpha (N-term) [N-Term]	10	4	2	0	3	0	0	1	NaN	NaN	NaN	24.4208	24.2279	24.2954	25.0714	25.4788	25.1175	19.719	NaN	NaN	NaN	NaN	NaN
BCLAF1	Q9NYF8	Bcl-2-associated transcription factor 1 OS=Homo sapiens OX=9606 GN=BCLAF1 PE=1 SV=2	[T]GPNNSNTTFQK	11	1xAbu-alpha (N-term) [N-Term]	10	4	2	3	0	0	0	1	22.1627	21.7115	21.3214	NaN	NaN	NaN	18.6315	19.4427	NaN	NaN	NaN	NaN	21.5871	21.6667	21.6629
PABPC3	Q9H361	Polyadenylate-binding protein 3 OS=Homo sapiens OX=9606 GN=PABPC3 PE=1 SV=2	[G]PRPAAAAAAAATPAVR	16	1xAbu-alpha (N-term) [N-Term]	8	4	2	3	0	0	0	1	24.1716	24.1944	23.9883	21.8657	22.029	22.4709	23.5543	23.7668	23.0845	NaN	21.2445	18.8036	23.5958	23.5514	23.6594
HNRNPA2B1	P22626	Heterogeneous nuclear ribonucleoproteins A2/B1 OS=Homo sapiens OX=9606 GN=HNRNPA2B1 PE=1 SV=2	[I]GGLSFETTEESLR	13	1xAbu-alpha (N-term) [N-Term]	13	4	2	3	0	0	0	1	23.1086	23.7319	23.8708	NaN	NaN	NaN	NaN	NaN	NaN	NaN	NaN	NaN	NaN	NaN	NaN
FEN1	P39748	Flap endonuclease 1 OS=Homo sapiens OX=9606 GN=FEN1 PE=1 SV=1	[Q]GRLDDFFK	8	1xAbu-alpha (N-term) [N-Term]	15	4	2	0	0	1	3	0	NaN	NaN	NaN	20.718	21.1711	21.4717	24.6732	25.183	24.2929	25.7929	25.8483	26.0654	NaN	NaN	NaN
EIF2S3	P41091;Q2VIR3	Eukaryotic translation initiation factor 2 subunit 3 OS=Homo sapiens OX=9606 GN=EIF2S3 PE=1 SV=3;Eukaryotic translation initiation factor 2 subunit 3B OS=Homo sapiens OX=9606 GN=EIF2S3B PE=2 SV=2	[Q]GTVAEGAPIIPISAQLK	17	1xAbu-alpha (N-term) [N-Term]	20	4	2	0	0	1	3	0	NaN	NaN	NaN	NaN	22.1618	NaN	21.6713	21.409	21.2483	21.3802	20.5085	21.2661	NaN	NaN	NaN
AFTPH	Q6ULP2	Aftiphilin OS=Homo sapiens OX=9606 GN=AFTPH PE=1 SV=3	[Q]GLPTLQQDEFLQSGVQSK	18	1xAbu-alpha (N-term) [N-Term]	31	4	2	0	0	1	3	0	21.2832	19.8896	21.3031	NaN	NaN	NaN	22.5853	22.9559	22.5416	24.9411	25.0193	24.9294	20.7	20.1029	NaN
BRD4	O60885	Bromodomain-containing protein 4 OS=Homo sapiens OX=9606 GN=BRD4 PE=1 SV=2	[Q]SLTHQSPPQQNVQPK	15	1xAbu-alpha (N-term) [N-Term]	18	4	2	0	0	1	3	0	21.2414	NaN	NaN	NaN	NaN	NaN	24.2046	24.9751	24.9901	25.4738	25.619	24.9559	NaN	NaN	NaN
MISP	Q8IVT2	Mitotic interactor and substrate of PLK1 OS=Homo sapiens OX=9606 GN=MISP PE=1 SV=1	[Q]GTPDHGDPRTPGPPR	15	1xAbu-alpha (N-term) [N-Term]	14	4	2	0	0	1	3	0	NaN	20.4337	NaN	NaN	21.764	20.21	24.6583	25.2982	25.2119	24.5066	24.6504	24.585	NaN	NaN	NaN
PABPC1	P11940	Polyadenylate-binding protein 1 OS=Homo sapiens OX=9606 GN=PABPC1 PE=1 SV=2	[Q]GQEPLTASMLASAPPQEQK	19	1xAbu-alpha (N-term) [N-Term]	38	4	2	0	0	1	3	0	NaN	NaN	NaN	NaN	21.0252	20.3902	25.2581	25.5386	23.5137	26.3604	26.0551	26.3085	NaN	NaN	NaN
ITPA	Q9BY32	Inosine triphosphate pyrophosphatase OS=Homo sapiens OX=9606 GN=ITPA PE=1 SV=2	[Q]GEPDEISIQK	10	1xAbu-alpha (N-term) [N-Term]	9	4	2	0	0	1	3	0	20.2039	NaN	19.7453	21.8659	22.3959	23.2723	23.8393	23.6855	22.8982	21.5643	22.0518	21.5496	NaN	NaN	NaN
ARFGAP3	Q9NP61	ADP-ribosylation factor GTPase-activating protein 3 OS=Homo sapiens OX=9606 GN=ARFGAP3 PE=1 SV=1	[P]SVEGLNVPTK	10	1xAbu-alpha (N-term) [N-Term]	12	4	2	0	0	1	3	0	NaN	NaN	NaN	23.3286	21.6804	23.3874	22.9251	22.8915	22.5064	22.4846	23.2821	22.6616	NaN	NaN	NaN
GTF2E1	P29083	General transcription factor IIE subunit 1 OS=Homo sapiens OX=9606 GN=GTF2E1 PE=1 SV=2	[Q]GAYGSEDMK	9	1xAbu-alpha (N-term) [N-Term]	13	4	2	0	0	1	3	0	NaN	NaN	NaN	20.0991	19.8504	18.5446	21.5822	21.5044	22.1421	23.5044	22.759	21.5273	18.4584	NaN	NaN
TJP2	A0A3B3IU51	Tight junction protein ZO-2 OS=Homo sapiens OX=9606 GN=TJP2 PE=1 SV=1	[Q]ASPPLDQDDR	10	1xAbu-alpha (N-term) [N-Term]	20	4	2	0	1	0	3	0	NaN	NaN	NaN	22.9773	23.3581	23.3795	19.4689	NaN	20.6011	21.9166	22.2124	22.1962	NaN	NaN	19.6416
MAGED2	Q5H909	Melanoma-associated antigen D2 OS=Homo sapiens OX=9606 GN=MAGED2 PE=1 SV=2	[Q]AVTMPATETK	10	1xAbu-alpha (N-term) [N-Term]	14	4	2	0	1	0	3	0	22.8946	23.9575	23.1843	22.7496	22.9608	23.1189	NaN	20.7227	NaN	24.8157	24.7764	24.1264	NaN	NaN	NaN
LENG8	E7EWC7	Leukocyte receptor cluster member 8 (Fragment) OS=Homo sapiens OX=9606 GN=LENG8 PE=1 SV=1	[Q]SFGSNAEGQHSGFGPQPNPEK	21	1xAbu-alpha (N-term) [N-Term]	16	4	2	0	1	0	3	0	NaN	NaN	NaN	20.1009	19.6353	20.103	NaN	21.5531	NaN	22.7852	23.2701	22.5792	NaN	NaN	NaN
CD2BP2	O95400	CD2 antigen cytoplasmic tail-binding protein 2 OS=Homo sapiens OX=9606 GN=CD2BP2 PE=1 SV=1	[Q]GVGDEEDEDEIIVPK	15	1xAbu-alpha (N-term) [N-Term]	18	4	2	0	0	2	2	0	NaN	NaN	NaN	21.8602	NaN	21.5903	24.5554	24.7175	24.5272	24.5244	24.6051	24.6085	NaN	NaN	NaN
ATXN2	A0A2R8Y5A6	Ataxin-2 OS=Homo sapiens OX=9606 GN=ATXN2 PE=1 SV=1	[Q]GVQTSSPACK	10	1xAbu-alpha (N-term) [N-Term];1xCarbamidomethyl [C9]	11	4	2	0	0	2	2	0	NaN	NaN	NaN	NaN	NaN	NaN	NaN	NaN	NaN	20.324	20.1434	NaN	NaN	NaN	NaN
HUWE1	Q7Z6Z7	E3 ubiquitin-protein ligase HUWE1 OS=Homo sapiens OX=9606 GN=HUWE1 PE=1 SV=3	[Q]GLLEGIGLDGDTLAPMETDEPTASDSK	27	1xAbu-alpha (N-term) [N-Term]	15	4	2	0	0	2	2	0	NaN	NaN	NaN	NaN	NaN	21.1934	22.1947	22.381	22.4641	22.3933	22.1673	NaN	NaN	NaN	NaN
MIS18BP1	Q6P0N0	Mis18-binding protein 1 OS=Homo sapiens OX=9606 GN=MIS18BP1 PE=1 SV=1	[Q]GVPLESSNNDIFLPVK	16	1xAbu-alpha (N-term) [N-Term]	12	4	2	0	0	2	2	0	NaN	NaN	NaN	NaN	NaN	NaN	23.3814	23.1686	22.8962	NaN	NaN	NaN	NaN	NaN	NaN
CDK12	Q9NYV4	Cyclin-dependent kinase 12 OS=Homo sapiens OX=9606 GN=CDK12 PE=1 SV=2	[Q]GTGSVQFPGDQDLR	14	1xAbu-alpha (N-term) [N-Term]	5	4	2	0	0	2	2	0	NaN	NaN	NaN	NaN	21.3172	21.1664	NaN	NaN	23.7828	NaN	NaN	NaN	NaN	NaN	NaN
SF3B2	E9PPJ0	Splicing factor 3B subunit 2 OS=Homo sapiens OX=9606 GN=SF3B2 PE=1 SV=1	[Q]AALLMQQEER	10	1xAbu-alpha (N-term) [N-Term]	14	4	2	0	0	2	2	0	20.2343	NaN	NaN	NaN	NaN	NaN	20.568	NaN	20.7607	NaN	19.7601	NaN	20.3475	20.0095	NaN
PCBP1	Q15365	Poly(rC)-binding protein 1 OS=Homo sapiens OX=9606 GN=PCBP1 PE=1 SV=2	[Q]GQHTISPLDLAK	12	1xAbu-alpha (N-term) [N-Term]	20	4	2	0	0	2	2	0	21.9673	22.076	20.1335	NaN	NaN	NaN	25.3558	25.5581	25.0538	22.0667	22.2937	22.0823	20.5045	21.3246	21.0172
ARID2	Q68CP9	AT-rich interactive domain-containing protein 2 OS=Homo sapiens OX=9606 GN=ARID2 PE=1 SV=2	[Q]AIEQVQTQTHVASAPASR	18	1xAbu-alpha (N-term) [N-Term]	16	4	2	0	2	0	2	0	NaN	NaN	NaN	23.4381	23.0276	23.4635	NaN	NaN	NaN	NaN	22.9618	22.378	NaN	NaN	NaN
SMAP1	A0A087X1X9	Stromal membrane-associated protein 1 OS=Homo sapiens OX=9606 GN=SMAP1 PE=1 SV=1	[Q]GGMVGQMGAPQSK	13	1xAbu-alpha (N-term) [N-Term]	9	4	2	0	2	0	2	0	19.9949	NaN	19.7806	21.8296	21.7292	21.8517	NaN	NaN	NaN	21.0091	21.1776	18.1247	18.7241	NaN	NaN
MATR3	A8MXP9;D6RBS2	Matrin-3 OS=Homo sapiens OX=9606 GN=MATR3 PE=1 SV=1;Matrin-3 (Fragment) OS=Homo sapiens OX=9606 GN=MATR3 PE=1 SV=1	[Q]SLSMPASLGR	10	1xAbu-alpha (N-term) [N-Term]	12	4	2	0	2	0	2	0	NaN	NaN	NaN	29.9856	30.5076	30.4218	25.2203	24.8859	24.9546	26.7124	26.8066	26.736	NaN	NaN	22.1329
PDLIM3	A0A087WYF8	PDZ and LIM domain protein 3 OS=Homo sapiens OX=9606 GN=PDLIM3 PE=1 SV=2	[Q]GMVDDGSDDRPAGTR	15	1xAbu-alpha (N-term) [N-Term]	11	4	2	0	2	0	2	0	NaN	NaN	NaN	NaN	21.0963	21.5907	20.9779	20.9445	21.4647	19.2716	19.6243	NaN	NaN	NaN	NaN
NHEJ1	Q9H9Q4	Non-homologous end-joining factor 1 OS=Homo sapiens OX=9606 GN=NHEJ1 PE=1 SV=1	[Q]GIDSQCVNQPEQLVSSAPTLSAPEK	25	1xAbu-alpha (N-term) [N-Term];1xCarbamidomethyl [C6]	9	4	2	2	0	0	2	0	23.1828	22.2031	22.2621	NaN	NaN	NaN	NaN	NaN	NaN	23.7866	24.0937	23.6993	NaN	NaN	NaN
NPC1	O15118	NPC intracellular cholesterol transporter 1 OS=Homo sapiens OX=9606 GN=NPC1 PE=1 SV=2	[Y]FVLEEGHDYTSSK	13	1xAbu-alpha (N-term) [N-Term]	7	4	2	2	0	0	2	0	24.103	23.489	23.9386	NaN	NaN	NaN	NaN	NaN	NaN	21.1874	21.1218	20.5687	20.0501	NaN	20.4851
NUP50	Q9UKX7	Nuclear pore complex protein Nup50 OS=Homo sapiens OX=9606 GN=NUP50 PE=1 SV=2	[P]SLFGSTK	7	1xAbu-alpha (N-term) [N-Term]	10	4	2	0	0	3	1	0	NaN	NaN	NaN	21.1658	20.5479	21.3012	24.0044	23.7837	24.17	23.8791	23.9626	NaN	NaN	NaN	NaN
ZNF318	Q5VUA4	Zinc finger protein 318 OS=Homo sapiens OX=9606 GN=ZNF318 PE=1 SV=2	[M]GGDHPSFTSGTR	12	1xAbu-alpha (N-term) [N-Term]	14	4	2	0	0	3	1	0	NaN	18.0295	NaN	21.5492	21.4325	21.7648	23.8413	24.0913	24.3862	21.5987	21.3659	17.2461	NaN	18.0589	NaN
BOLA1	Q9Y3E2	BolA-like protein 1 OS=Homo sapiens OX=9606 GN=BOLA1 PE=1 SV=1	[Q]GSAGSGAIGPVEAAIR	16	1xAbu-alpha (N-term) [N-Term]	17	4	2	0	0	3	1	0	NaN	NaN	NaN	NaN	NaN	NaN	24.2044	24.5229	23.9907	23.3291	23.65	23.5846	21.7521	19.7164	21.5214
LASP1	Q14847	LIM and SH3 domain protein 1 OS=Homo sapiens OX=9606 GN=LASP1 PE=1 SV=2	[Y]GGYKEPAAPVSIQR	14	1xAbu-alpha (N-term) [N-Term]	12	4	3	1	0	2	1	0	23.4567	23.0725	23.2129	22.5727	22.9795	22.8333	23.1839	23.6876	23.8246	21.8218	23.5682	22.9717	22.1778	21.8911	22.6769
SHROOM1	A6NN40	Protein Shroom1 OS=Homo sapiens OX=9606 GN=SHROOM1 PE=1 SV=1	[Q]GAETPRPLFQTK	12	1xAbu-alpha (N-term) [N-Term]	12	4	2	0	3	0	1	0	24.6822	23.8398	22.9778	26.5078	26.3442	26.5485	23.1054	23.038	23.028	23.137	22.9401	NaN	23.7931	NaN	23.7578
PRPF31	E7EVX8	U4/U6 small nuclear ribonucleoprotein Prp31 OS=Homo sapiens OX=9606 GN=PRPF31 PE=1 SV=1	[Q]GLEIVNPQAAEKK	13	1xAbu-alpha (N-term) [N-Term]	14	4	2	0	3	0	1	0	22.1658	21.6657	21.7132	26.4148	26.248	26.491	NaN	NaN	NaN	24.1322	24.2713	23.8363	NaN	NaN	NaN
RPA2	P15927	Replication protein A 32 kDa subunit OS=Homo sapiens OX=9606 GN=RPA2 PE=1 SV=1	[Y]GSSSYGGAGGYTQSPGGFGSPAPSQAEKK	29	1xAbu-alpha (N-term) [N-Term]	10	4	2	0	3	0	1	0	22.3225	21.6604	NaN	NaN	22.0112	22.5899	NaN	NaN	NaN	NaN	NaN	18.4998	NaN	NaN	NaN
KIDINS220	A0A1W2PPB7	Kinase D-interacting substrate of 220 kDa OS=Homo sapiens OX=9606 GN=KIDINS220 PE=1 SV=1	[L]GLDEGAPR	8	1xAbu-alpha (N-term) [N-Term]	9	4	2	0	3	0	1	0	24.509	24.0026	24.2038	26.761	26.6626	26.8345	NaN	NaN	19.4222	18.6817	NaN	20.1961	20.6921	20.9109	20.2396
HNRNPM	M0QZM1;P52272	Heterogeneous nuclear ribonucleoprotein M (Fragment) OS=Homo sapiens OX=9606 GN=HNRNPM PE=1 SV=1;Heterogeneous nuclear ribonucleoprotein M OS=Homo sapiens OX=9606 GN=HNRNPM PE=1 SV=3	[GN]GGGGGSVPGIER	12	1xAbu-alpha (N-term) [N-Term]	17	4	3	1	2	0	1	0	22.953	24.2016	22.3492	23.6703	23.1567	23.39	NaN	NaN	19.6483	22.7923	21.8757	NaN	19.6908	21.4175	21.3314
EEF1D	P29692	Elongation factor 1-delta OS=Homo sapiens OX=9606 GN=EEF1D PE=1 SV=5	[GQ]SSGPGASSGTSGDHGELVVR	20	1xAbu-alpha (N-term) [N-Term]	17	4	3	2	1	0	1	0	21.193	21.2156	21.6102	21.6933	21.6942	22.2019	21.8192	21.8968	21.9939	23.5033	23.4758	22.9072	NaN	NaN	NaN
TNKS1BP1	Q9C0C2	182 kDa tankyrase-1-binding protein OS=Homo sapiens OX=9606 GN=TNKS1BP1 PE=1 SV=4	[Y]GTTTAPRDEDGSTLFR	16	1xAbu-alpha (N-term) [N-Term]	13	4	2	3	0	0	1	0	24.5506	23.7841	23.9572	NaN	21.3044	20.718	NaN	NaN	NaN	20.5263	20.6609	20.2742	21.0382	19.7511	21.1509
TOMM40	K7EJ57	Mitochondrial import receptor subunit TOM40 homolog (Fragment) OS=Homo sapiens OX=9606 GN=TOMM40 PE=1 SV=8	[A]ASSPPAGPPPPPAPALVGLPPPPPSPPGFTLPPLGGSLGAGTSTSR	46	1xAbu-alpha (N-term) [N-Term]	6	4	2	0	1	3	0	0	NaN	NaN	NaN	20.8949	NaN	NaN	24.5504	24.1157	25.8059	NaN	NaN	NaN	NaN	NaN	NaN
CAPRIN1	Q14444	Caprin-1 OS=Homo sapiens OX=9606 GN=CAPRIN1 PE=1 SV=2	[G]NHQQPPQQNTGFPR	14	1xAbu-alpha (N-term) [N-Term]	5	4	2	1	0	3	0	0	NaN	23.8812	24.0429	20.5529	20.8207	NaN	23.6303	24.5924	24.841	NaN	22.0055	21.2433	22.6133	22.9921	22.6578
TPD52L1	E9PNK6	Tumor protein D53 OS=Homo sapiens OX=9606 GN=TPD52L1 PE=1 SV=1	[Q]GLLETEPLQGTDEDAVASADFSSMLSEEEKEELK	34	1xAbu-alpha (N-term) [N-Term]	13	4	2	1	0	3	0	0	23.5502	23.2737	23.2033	23.3609	24.2127	23.6206	24.6437	24.8492	25.3908	NaN	NaN	NaN	NaN	NaN	NaN
CYB561	F5H757	Cytochrome b561 OS=Homo sapiens OX=9606 GN=CYB561 PE=1 SV=1	[Q]ALSMDFK	7	1xAbu-alpha (N-term) [N-Term]	5	4	2	0	2	2	0	0	NaN	NaN	NaN	23.5437	23.7463	23.8521	22.7006	NaN	21.985	NaN	NaN	NaN	NaN	NaN	NaN
ZGPAT	Q8N5A5	Zinc finger CCCH-type with G patch domain-containing protein OS=Homo sapiens OX=9606 GN=ZGPAT PE=1 SV=3	[Q]AFREAITEAVEAPAAAR	17	1xAbu-alpha (N-term) [N-Term]	7	4	2	0	2	2	0	0	NaN	NaN	NaN	23.8792	23.6051	24.0321	22.6749	22.689	NaN	NaN	NaN	20.0244	NaN	NaN	NaN
RBM26	Q5T8P6	RNA-binding protein 26 OS=Homo sapiens OX=9606 GN=RBM26 PE=1 SV=3	[T]GIHHQPPPAPPSLFTADTYDTDGYNPEAPSITNTSRPMYR	40	1xAbu-alpha (N-term) [N-Term]	6	4	2	2	0	2	0	0	24.5986	23.7769	24.207	NaN	NaN	NaN	24.2848	24.5194	NaN	NaN	NaN	NaN	NaN	19.8115	NaN
SMARCC2	Q8TAQ2	SWI/SNF complex subunit SMARCC2 OS=Homo sapiens OX=9606 GN=SMARCC2 PE=1 SV=1	[F]GLRTDMYTK	9	1xAbu-alpha (N-term) [N-Term]	15	4	2	2	0	2	0	0	25.5789	24.755	24.8507	21.8411	21.8012	22.2203	26.3547	26.53	26.515	NaN	NaN	NaN	23.6922	23.415	23.66
ALDH1B1	P30837	Aldehyde dehydrogenase X, mitochondrial OS=Homo sapiens OX=9606 GN=ALDH1B1 PE=1 SV=3	[S]SAAALPSPILNPDIPYNQLFINNEWQDAVSKK	32	1xAbu-alpha (N-term) [N-Term]	11	4	2	2	0	2	0	0	24.9282	24.9203	24.8803	24.1689	NaN	NaN	24.9587	25.0019	24.3636	NaN	NaN	NaN	NaN	NaN	NaN
NCOA5	Q9HCD5	Nuclear receptor coactivator 5 OS=Homo sapiens OX=9606 GN=NCOA5 PE=1 SV=2	[S]GTVTANSSSASPSVAAGNTPNQNFSTAANSQPQQR	35	1xAbu-alpha (N-term) [N-Term]	17	4	2	2	0	2	0	0	19.841	20.5808	20.9091	NaN	NaN	NaN	25.2254	26.4599	26.1313	NaN	NaN	NaN	19.9762	NaN	19.3757
HSP90AB1	P08238	Heat shock protein HSP 90-beta OS=Homo sapiens OX=9606 GN=HSP90AB1 PE=1 SV=4	[Q]ALRDNSTMGYMMAKK	15	1xAbu-alpha (N-term) [N-Term]	8	4	2	0	3	1	0	0	NaN	NaN	NaN	23.4584	23.5643	23.8617	25.8977	27.1501	26.9364	NaN	NaN	19.6699	NaN	NaN	NaN
AHNAK	Q09666	Neuroblast differentiation-associated protein AHNAK OS=Homo sapiens OX=9606 GN=AHNAK PE=1 SV=2	[HQR]GPDWHLK	7	1xAbu-alpha (N-term) [N-Term]	12	4	2	0	3	1	0	0	NaN	NaN	NaN	25.9224	25.4778	25.8386	25.6533	25.4133	25.7017	NaN	NaN	NaN	NaN	NaN	NaN
NCAPH	Q15003	Condensin complex subunit 2 OS=Homo sapiens OX=9606 GN=NCAPH PE=1 SV=3	[Y]GESNLVAEPQK	11	1xAbu-alpha (N-term) [N-Term]	17	4	2	0	3	1	0	0	26.713	26.1206	26.3544	24.7508	24.653	24.9544	25.5854	25.8359	25.9441	26.5305	26.505	25.9297	26.1366	26.1926	26.1838
CAPRIN1	Q14444	Caprin-1 OS=Homo sapiens OX=9606 GN=CAPRIN1 PE=1 SV=2	[Q]SQFSAPR	7	1xAbu-alpha (N-term) [N-Term]	15	4	2	0	3	1	0	0	25.8907	25.5932	26.0661	25.5749	25.1929	25.4397	25.0329	25.1971	25.5097	25.9984	25.5503	24.7826	NaN	NaN	NaN
KLHL26	Q53HC5	Kelch-like protein 26 OS=Homo sapiens OX=9606 GN=KLHL26 PE=1 SV=2	[F]GGTPYTDSDR	10	1xAbu-alpha (N-term) [N-Term]	4	4	2	0	3	1	0	0	NaN	NaN	NaN	23.0175	22.7363	22.9692	19.7759	NaN	20.3695	NaN	NaN	NaN	NaN	NaN	NaN
TCP1	P17987	T-complex protein 1 subunit alpha OS=Homo sapiens OX=9606 GN=TCP1 PE=1 SV=1	[E]AAITILR	7	1xAbu-alpha (N-term) [N-Term]	6	4	2	0	3	1	0	0	NaN	NaN	NaN	22.5091	21.8591	22.6694	23.449	23.1154	21.3309	NaN	NaN	NaN	NaN	NaN	NaN
SLC9A3R1	O14745	Na(+)/H(+) exchange regulatory cofactor NHE-RF1 OS=Homo sapiens OX=9606 GN=SLC9A3R1 PE=1 SV=4	[Q]GAGNENEPREADK	13	1xAbu-alpha (N-term) [N-Term]	8	4	2	3	0	1	0	0	22.8181	22.3597	22.663	16.9145	16.1375	NaN	22.3314	23.141	21.5073	NaN	NaN	NaN	NaN	NaN	NaN
CDC5L	Q99459	Cell division cycle 5-like protein OS=Homo sapiens OX=9606 GN=CDC5L PE=1 SV=2	[M]ALTNVDTPLK	10	1xAbu-alpha (N-term) [N-Term]	5	4	2	3	0	1	0	0	24.5501	24.514	23.1342	20.154	21.7942	20.0902	22.0468	NaN	NaN	19.7661	NaN	21.1702	21.0552	NaN	21.274
PRDX4	Q13162	Peroxiredoxin-4 OS=Homo sapiens OX=9606 GN=PRDX4 PE=1 SV=1	[V]QGWETEERPR	10	1xAbu-alpha (N-term) [N-Term]	3	3	2	0	0	0	1	2	22.2089	20.6598	NaN	NaN	NaN	NaN	20.3947	20.5251	21.4421	NaN	NaN	20.9889	NaN	NaN	NaN
SRRM2	Q9UQ35	Serine/arginine repetitive matrix protein 2 OS=Homo sapiens OX=9606 GN=SRRM2 PE=1 SV=2	[N]GMLSVPAPGVPHSDVGEPPASTGAQQPSALAALQPAK	37	1xAbu-alpha (N-term) [N-Term]	15	3	2	0	0	0	1	2	21.4819	NaN	NaN	NaN	NaN	NaN	NaN	NaN	NaN	NaN	NaN	22.4993	18.9679	22.4993	19.7784
ATP2B4	P23634	Plasma membrane calcium-transporting ATPase 4 OS=Homo sapiens OX=9606 GN=ATP2B4 PE=1 SV=2	[H]SFMTHPEFAIEEELPR	16	1xAbu-alpha (N-term) [N-Term]	12	3	2	0	0	1	0	2	22.8044	22.6874	22.1795	23.1435	22.0315	23.2283	24.4544	24.5046	24.5255	22.6485	22.5027	NaN	22.5622	22.5267	22.2575
LEMD3	Q9Y2U8	Inner nuclear membrane protein Man1 OS=Homo sapiens OX=9606 GN=LEMD3 PE=1 SV=2	[Q]GGGCDQVDSSPVPR	14	1xAbu-alpha (N-term) [N-Term];1xCarbamidomethyl [C4]	13	3	2	0	0	1	0	2	NaN	NaN	NaN	NaN	NaN	NaN	22.7633	22.5555	23.2205	21.3514	20.4284	19.7502	21.6324	21.7986	21.5951
HTATSF1	O43719	HIV Tat-specific factor 1 OS=Homo sapiens OX=9606 GN=HTATSF1 PE=1 SV=1	[Y]GFSNDGASSSTANVEDVHAR	20	1xAbu-alpha (N-term) [N-Term]	17	3	2	0	0	1	0	2	20.8309	20.1064	19.5567	NaN	NaN	NaN	22.1636	22.9036	22.5451	NaN	NaN	19.5651	27.1072	26.8609	27.0111
HNRNPM	M0QZM1;P52272	Heterogeneous nuclear ribonucleoprotein M (Fragment) OS=Homo sapiens OX=9606 GN=HNRNPM PE=1 SV=1;Heterogeneous nuclear ribonucleoprotein M OS=Homo sapiens OX=9606 GN=HNRNPM PE=1 SV=3	[E]GIGFGINK	8	1xAbu-alpha (N-term) [N-Term]	9	3	2	1	0	0	0	2	24.1856	24.3604	NaN	27.4583	27.4803	27.4362	27.3695	27.3042	26.9469	NaN	NaN	NaN	NaN	NaN	NaN
INF2	Q27J81	Inverted formin-2 OS=Homo sapiens OX=9606 GN=INF2 PE=1 SV=2	[D]AVTPGPQPTLEQLEEGGPRPLERR	24	1xAbu-alpha (N-term) [N-Term]	19	3	2	1	0	0	0	2	NaN	NaN	NaN	20.0334	NaN	NaN	23.5351	NaN	23.1408	NaN	NaN	NaN	23.6796	NaN	23.2945
BASP1	P80723	Brain acid soluble protein 1 OS=Homo sapiens OX=9606 GN=BASP1 PE=1 SV=2	[E]AAAAPAESAAPAAGEEPSKEEGEPK	25	1xAbu-alpha (N-term) [N-Term]	4	3	2	1	0	0	0	2	NaN	NaN	NaN	NaN	NaN	NaN	NaN	NaN	NaN	NaN	NaN	NaN	NaN	NaN	19.164
DDX17	A0A1W2PQ51	Probable ATP-dependent RNA helicase DDX17 OS=Homo sapiens OX=9606 GN=DDX17 PE=1 SV=1	[A]YQYPPPPPPPPPSRK	15	1xAbu-alpha (N-term) [N-Term]	11	3	2	1	0	0	0	2	NaN	20.3577	NaN	NaN	NaN	NaN	NaN	NaN	NaN	NaN	NaN	NaN	22.7309	21.8721	22.3755
TLE3	H0YKT5	Transducin-like enhancer protein 3 OS=Homo sapiens OX=9606 GN=TLE3 PE=1 SV=1	[T]GLPSSLASIPGGK	13	1xAbu-alpha (N-term) [N-Term]	12	3	2	1	0	0	0	2	24.2183	23.102	23.7755	NaN	NaN	NaN	NaN	NaN	NaN	NaN	NaN	NaN	25.4098	25.603	25.405
MKI67	P46013	Proliferation marker protein Ki-67 OS=Homo sapiens OX=9606 GN=MKI67 PE=1 SV=2	[N]AADPISGDFK	10	1xAbu-alpha (N-term) [N-Term]	9	3	2	0	0	0	2	1	NaN	NaN	NaN	NaN	NaN	NaN	NaN	NaN	NaN	21.1216	20.8545	21.2911	19.9721	19.9873	19.5417
SHMT2	P34897	Serine hydroxymethyltransferase, mitochondrial OS=Homo sapiens OX=9606 GN=SHMT2 PE=1 SV=3	[N]AAQTQTGEANRGWTGQESLSDSDPEMWELLQR	32	1xAbu-alpha (N-term) [N-Term]	11	3	2	0	0	0	2	1	20.2522	NaN	NaN	21.3598	20.8545	NaN	NaN	NaN	21.4345	NaN	NaN	NaN	21.4946	21.0219	21.4652
DDX42	Q86XP3	ATP-dependent RNA helicase DDX42 OS=Homo sapiens OX=9606 GN=DDX42 PE=1 SV=1	[Q]GHNSPDSPVTSAAK	14	1xAbu-alpha (N-term) [N-Term]	16	3	2	0	0	0	2	1	NaN	NaN	NaN	NaN	17.674	19.3041	NaN	NaN	NaN	21.0552	20.6512	19.1937	NaN	18.2821	16.9527
HNRNPA1L2	Q32P51;P09651	Heterogeneous nuclear ribonucleoprotein A1-like 2 OS=Homo sapiens OX=9606 GN=HNRNPA1L2 PE=2 SV=2;Heterogeneous nuclear ribonucleoprotein A1 OS=Homo sapiens OX=9606 GN=HNRNPA1 PE=1 SV=5	[D]CVVMRDPNTK	10	1xAbu-alpha (N-term) [N-Term];1xCarbamidomethyl [C1]	8	3	2	0	0	0	2	1	NaN	NaN	NaN	NaN	NaN	NaN	23.0628	23.1232	22.6656	21.9187	21.5224	20.93	NaN	19.6656	20.1507
UBE2O	K7ES11	(E3-independent) E2 ubiquitin-conjugating enzyme (Fragment) OS=Homo sapiens OX=9606 GN=UBE2O PE=1 SV=1	[Q]GAVAMAAPMAGLMEK	15	1xAbu-alpha (N-term) [N-Term]	12	3	2	0	0	0	2	1	21.8315	22.7293	21.2655	22.4064	NaN	NaN	22.5859	22.9103	23.1553	22.4503	22.4679	22.3189	NaN	NaN	NaN
RBM14	Q96PK6	RNA-binding protein 14 OS=Homo sapiens OX=9606 GN=RBM14 PE=1 SV=2	[F]GNSTGGFDGQAR	12	1xAbu-alpha (N-term) [N-Term]	12	3	2	0	0	2	0	1	21.7458	22.1584	22.0131	17.1085	NaN	NaN	22.1731	22.2906	21.8169	19.728	19.7124	NaN	19.7757	20.4601	20.5054
TLE3	H0YKT5	Transducin-like enhancer protein 3 OS=Homo sapiens OX=9606 GN=TLE3 PE=1 SV=1	[L]GALGSQAHLTVK	12	1xAbu-alpha (N-term) [N-Term]	12	3	2	0	2	0	0	1	NaN	NaN	NaN	22.8832	22.8807	23.1971	NaN	NaN	20.9658	NaN	NaN	NaN	20.8693	20.0281	21.0735
LRPAP1	P30533	Alpha-2-macroglobulin receptor-associated protein OS=Homo sapiens OX=9606 GN=LRPAP1 PE=1 SV=1	[N]SLSGTQEDGLDDPR	14	1xAbu-alpha (N-term) [N-Term]	8	3	2	0	2	0	0	1	21.9854	21.0305	NaN	20.655	20.5026	20.875	NaN	NaN	NaN	NaN	NaN	NaN	NaN	NaN	NaN
HNRNPK	P61978;Q5T6W2	Heterogeneous nuclear ribonucleoprotein K OS=Homo sapiens OX=9606 GN=HNRNPK PE=1 SV=1;Heterogeneous nuclear ribonucleoprotein K (Fragment) OS=Homo sapiens OX=9606 GN=HNRNPK PE=1 SV=1	[Q]GGSGYDYSYAGGRGSYGDLGGPIITTQVTIPK	32	1xAbu-alpha (N-term) [N-Term]	17	3	2	0	2	0	0	1	22.2494	21.2429	NaN	23.5279	21.6835	23.8504	NaN	NaN	NaN	25.7387	25.9209	25.8578	NaN	NaN	NaN
RBM14	Q96PK6	RNA-binding protein 14 OS=Homo sapiens OX=9606 GN=RBM14 PE=1 SV=2	[N]ANSTPPPYER	10	1xAbu-alpha (N-term) [N-Term]	7	3	2	2	0	0	0	1	NaN	23.6687	23.5885	NaN	NaN	NaN	NaN	NaN	NaN	21.7346	21.862	21.804	22.1584	22.7439	22.2285
DDX17	A0A1W2PQ51	Probable ATP-dependent RNA helicase DDX17 OS=Homo sapiens OX=9606 GN=DDX17 PE=1 SV=1	[I]GYMGQTAYQYPPPPPPPPPSRK	22	1xAbu-alpha (N-term) [N-Term]	11	3	2	2	0	0	0	1	NaN	23.1404	NaN	NaN	NaN	NaN	NaN	NaN	NaN	NaN	NaN	NaN	NaN	NaN	NaN
TACC2	O95359	Transforming acidic coiled-coil-containing protein 2 OS=Homo sapiens OX=9606 GN=TACC2 PE=1 SV=3	[Q]ACASGDLPEAGTTR	14	1xAbu-alpha (N-term) [N-Term];1xCarbamidomethyl [C2]	19	3	2	0	0	1	2	0	NaN	NaN	NaN	NaN	18.7489	NaN	24.7024	24.9597	25.2378	23.5686	23.6501	23.089	NaN	NaN	NaN
DYNC1I2	E7EQL5	Cytoplasmic dynein 1 intermediate chain 2 (Fragment) OS=Homo sapiens OX=9606 GN=DYNC1I2 PE=1 SV=1	[Q]SMGLTPESPIVPPPMSPSSK	20	1xAbu-alpha (N-term) [N-Term]	16	3	2	0	0	1	2	0	22.1271	NaN	NaN	NaN	NaN	NaN	NaN	22.9802	21.4259	22.8344	22.7695	22.4825	NaN	NaN	NaN
WAC	Q9BTA9	WW domain-containing adapter protein with coiled-coil OS=Homo sapiens OX=9606 GN=WAC PE=1 SV=3	[P]VSQSATQQPVTADK	14	1xAbu-alpha (N-term) [N-Term]	18	3	2	0	0	1	2	0	NaN	NaN	NaN	NaN	NaN	NaN	20.6356	21.2992	21.6991	20.8387	21.1948	20.9141	NaN	NaN	NaN
SEC23IP	A0A0C4DH82	SEC23-interacting protein OS=Homo sapiens OX=9606 GN=SEC23IP PE=1 SV=1	[Q]GIPQPGYNPYR	11	1xAbu-alpha (N-term) [N-Term]	11	3	2	0	0	1	2	0	NaN	NaN	NaN	21.4509	21.4467	NaN	21.6606	21.8116	21.5108	21.7865	20.1067	21.8398	NaN	NaN	NaN
RPL26	P61254	60S ribosomal protein L26 OS=Homo sapiens OX=9606 GN=RPL26 PE=1 SV=1	[R]SMPIRKDDEVQVVR	14	1xAbu-alpha (N-term) [N-Term]	16	3	2	0	0	1	2	0	22.6604	22.648	22.7902	21.2866	21.3641	21.3564	24.6781	25.1461	25.1474	23.3633	23.6286	22.9005	21.8285	21.6562	22.1261
HNRNPK	P61978;Q5T6W2	Heterogeneous nuclear ribonucleoprotein K OS=Homo sapiens OX=9606 GN=HNRNPK PE=1 SV=1;Heterogeneous nuclear ribonucleoprotein K (Fragment) OS=Homo sapiens OX=9606 GN=HNRNPK PE=1 SV=1	[M]AYEPQGGSGYDYSYAGGRGSYGDLGGPIITTQVTIPK	37	1xAbu-alpha (N-term) [N-Term]	13	3	2	0	0	1	2	0	NaN	NaN	NaN	NaN	NaN	NaN	NaN	NaN	NaN	25.674	25.8252	25.8686	NaN	NaN	NaN
CSTF3	Q12996	Cleavage stimulation factor subunit 3 OS=Homo sapiens OX=9606 GN=CSTF3 PE=1 SV=1	[Q]AAEYVPEK	8	1xAbu-alpha (N-term) [N-Term]	7	3	2	0	0	1	2	0	NaN	19.4601	20.5022	20.3541	19.066	18.2138	23.2504	23.0159	18.9731	21.1045	21.4397	20.9142	21.6548	18.476	20.0235
FLYWCH1	Q4VC44	FLYWCH-type zinc finger-containing protein 1 OS=Homo sapiens OX=9606 GN=FLYWCH1 PE=1 SV=2	[Q]GGVVQPALEMPEQK	14	1xAbu-alpha (N-term) [N-Term]	17	3	2	0	0	1	2	0	NaN	NaN	NaN	25.3141	24.1021	25.2388	22.4636	22.9398	NaN	21.9827	22.9137	22.8546	NaN	NaN	NaN
PTBP1	A0A0U1RRM4	Polypyrimidine tract-binding protein 1 OS=Homo sapiens OX=9606 GN=PTBP1 PE=1 SV=1	[L]SVPNVHGALAPLAIPSAAAAAAAAGR	26	1xAbu-alpha (N-term) [N-Term]	12	3	2	0	1	0	2	0	NaN	NaN	NaN	23.3554	23.1738	24.3818	NaN	NaN	NaN	23.2516	24.0027	23.4535	NaN	NaN	NaN
PKNOX1	P55347	Homeobox protein PKNOX1 OS=Homo sapiens OX=9606 GN=PKNOX1 PE=1 SV=3	[Q]GQVVTQTLSPGTIR	14	1xAbu-alpha (N-term) [N-Term]	16	3	2	0	1	0	2	0	NaN	NaN	NaN	23.9267	23.6582	23.8762	NaN	NaN	NaN	23.1055	22.8847	22.5791	19.1991	NaN	NaN
ESYT2	H7BXI1	Extended synaptotagmin-2 (Fragment) OS=Homo sapiens OX=9606 GN=ESYT2 PE=1 SV=1	[Q]GLHDLGR	7	1xAbu-alpha (N-term) [N-Term]	10	3	2	0	1	0	2	0	NaN	NaN	NaN	24.1043	23.7654	24.055	23.1128	22.9813	22.5527	23.5666	23.1592	22.4815	NaN	NaN	NaN
EIF3I	Q13347	Eukaryotic translation initiation factor 3 subunit I OS=Homo sapiens OX=9606 GN=EIF3I PE=1 SV=1	[W]CVDADWDTK	9	1xAbu-alpha (N-term) [N-Term];1xCarbamidomethyl [C1]	6	3	2	1	0	0	2	0	22.1655	21.8649	22.3057	NaN	NaN	NaN	NaN	NaN	NaN	19.6391	NaN	19.6998	NaN	NaN	NaN
HMGCS1	Q01581	Hydroxymethylglutaryl-CoA synthase, cytoplasmic OS=Homo sapiens OX=9606 GN=HMGCS1 PE=1 SV=2	[G]SLPLNAEACWPK	12	1xAbu-alpha (N-term) [N-Term];1xCarbamidomethyl [C9]	7	3	2	1	0	0	2	0	NaN	NaN	NaN	NaN	NaN	NaN	23.1787	23.1151	22.9678	NaN	NaN	NaN	NaN	NaN	NaN
PROSER3	A0A2R8Y8D9	Proline and serine-rich protein 3 (Fragment) OS=Homo sapiens OX=9606 GN=PROSER3 PE=1 SV=1	[Q]GLPIPDPSSCAQPK	14	1xAbu-alpha (N-term) [N-Term];1xCarbamidomethyl [C10]	8	3	2	1	0	0	2	0	20.1889	NaN	NaN	NaN	NaN	NaN	NaN	NaN	NaN	19.4336	19.3977	22.0905	NaN	NaN	NaN
SP4	Q02446	Transcription factor Sp4 OS=Homo sapiens OX=9606 GN=SP4 PE=1 SV=2	[Q]GVPVTITSVAGQQQGQDGVK	20	1xAbu-alpha (N-term) [N-Term]	7	3	2	0	0	2	1	0	NaN	NaN	NaN	NaN	NaN	NaN	22.0334	22.7155	21.2074	NaN	NaN	NaN	NaN	NaN	20.5517
EIF4G1	Q04637;C9K073	Eukaryotic translation initiation factor 4 gamma 1 OS=Homo sapiens OX=9606 GN=EIF4G1 PE=1 SV=4;Eukaryotic translation initiation factor 4 gamma 1 (Fragment) OS=Homo sapiens OX=9606 GN=EIF4G1 PE=1 SV=1	[A]GSQVMMIPSQISYPASQGAYYIPGQGR	27	1xAbu-alpha (N-term) [N-Term]	8	3	2	0	0	2	1	0	NaN	NaN	NaN	NaN	NaN	NaN	25.5152	25.6727	25.6482	NaN	NaN	NaN	NaN	NaN	NaN
RABEP1	Q15276	Rab GTPase-binding effector protein 1 OS=Homo sapiens OX=9606 GN=RABEP1 PE=1 SV=2	[Q]GMESAYVSPSGYR	13	1xAbu-alpha (N-term) [N-Term]	14	3	2	0	0	2	1	0	NaN	NaN	NaN	NaN	NaN	NaN	27.8184	27.9975	28.0797	20.834	22.4541	21.9186	19.5751	19.654	20.9402
THRAP3	Q9Y2W1	Thyroid hormone receptor-associated protein 3 OS=Homo sapiens OX=9606 GN=THRAP3 PE=1 SV=2	[Q]TFSGGTSQDTK	11	1xAbu-alpha (N-term) [N-Term]	13	3	2	0	0	2	1	0	NaN	NaN	20.7442	NaN	NaN	NaN	22.808	22.9528	23.1492	21.8947	21.4212	20.0409	NaN	NaN	NaN
HNRNPD	Q14103	Heterogeneous nuclear ribonucleoprotein D0 OS=Homo sapiens OX=9606 GN=HNRNPD PE=1 SV=1	[Q]GAAAAAGSGAGTGGGTASGGTEGGSAESEGAKIDASKNEEDEGHSNSSPR	50	1xAbu-alpha (N-term) [N-Term]	6	3	2	0	0	2	1	0	NaN	NaN	NaN	23.8804	24.1125	25.2201	23.3354	24.7518	23.9394	23.3934	22.6265	22.0808	NaN	NaN	NaN
YBX1	P67809	Nuclease-sensitive element-binding protein 1 OS=Homo sapiens OX=9606 GN=YBX1 PE=1 SV=3	[Q]GAGEQGRPVRQNMYR	15	1xAbu-alpha (N-term) [N-Term]	8	3	2	0	0	2	1	0	NaN	NaN	NaN	24.2807	24.0764	24.9098	26.1262	26.9168	27.2059	25.0888	24.9689	24.8072	24.2618	24.2615	23.8387
PAGE1	O75459	P antigen family member 1 OS=Homo sapiens OX=9606 GN=PAGE1 PE=1 SV=2	[Q]GQEPEADSQELVQPK	15	1xAbu-alpha (N-term) [N-Term]	19	3	2	0	0	2	1	0	22.0393	20.912	21.6655	19.5552	19.3504	19.5758	24.7314	24.7102	24.91	23.3122	23.4717	23.2343	20.0491	19.572	NaN
WNK1	F5GWT4	Serine/threonine-protein kinase WNK1 OS=Homo sapiens OX=9606 GN=WNK1 PE=1 SV=1	[Q]SAPPEPHREETVTATATSQVAQQPPAAAAPGEQAVAGPAPSTVPSSTSK	49	1xAbu-alpha (N-term) [N-Term]	6	3	2	0	2	0	1	0	20.8004	20.8316	NaN	25.5301	25.3425	25.7608	NaN	NaN	NaN	23.2649	21.2752	19.5335	NaN	NaN	NaN
SLC3A2	F5GZS6;P08195	4F2 cell-surface antigen heavy chain OS=Homo sapiens OX=9606 GN=SLC3A2 PE=1 SV=1;4F2 cell-surface antigen heavy chain OS=Homo sapiens OX=9606 GN=SLC3A2 PE=1 SV=3	[L]ASSDPPALASK	11	1xAbu-alpha (N-term) [N-Term]	7	3	2	0	2	0	1	0	NaN	NaN	NaN	22.8729	22.9494	23.3811	NaN	NaN	NaN	20.9973	21.0588	20.5483	20.8027	20.8318	21.0094
RAN	P62826	GTP-binding nuclear protein Ran OS=Homo sapiens OX=9606 GN=RAN PE=1 SV=3	[L]VFHTNRGPIK	10	1xAbu-alpha (N-term) [N-Term]	5	3	2	2	0	0	1	0	23.2857	23.3623	23.6875	19.0744	19.4854	18.2908	22.9152	23.3861	22.7245	22.2424	22.4609	26.0355	21.423	23.6719	22.5162
SERBP1	Q8NC51	Plasminogen activator inhibitor 1 RNA-binding protein OS=Homo sapiens OX=9606 GN=SERBP1 PE=1 SV=2	[K]SKSEEAHAEDSVMDHHFR	18	1xAbu-alpha (N-term) [N-Term]	5	3	2	0	1	2	0	0	NaN	NaN	NaN	NaN	21.9426	22.2253	NaN	22.4675	22.516	NaN	NaN	NaN	NaN	NaN	NaN
FUNDC2	Q9BWH2	FUN14 domain-containing protein 2 OS=Homo sapiens OX=9606 GN=FUNDC2 PE=1 SV=2	[Q]GNFEGNFESLDLAEFAK	17	1xAbu-alpha (N-term) [N-Term]	15	3	2	0	1	2	0	0	NaN	NaN	NaN	19.5003	18.6412	NaN	21.9105	22.1217	22.1824	21.5246	23.7782	20.6027	NaN	NaN	NaN
FLYWCH2	I3L4I0	FLYWCH family member 2 (Fragment) OS=Homo sapiens OX=9606 GN=FLYWCH2 PE=1 SV=1	[L]GVPGPATLAK	10	1xAbu-alpha (N-term) [N-Term]	11	3	2	0	1	2	0	0	NaN	NaN	NaN	23.2864	23.3463	23.4781	25.3505	25.2	25.0895	NaN	NaN	NaN	NaN	NaN	NaN
SP3	H0Y7L6	Transcription factor Sp3 (Fragment) OS=Homo sapiens OX=9606 GN=SP3 PE=1 SV=1	[LQ]SATPTTIK	8	1xAbu-alpha (N-term) [N-Term]	10	3	2	0	1	2	0	0	21.2089	20.6983	21.446	22.1578	20.7245	19.9834	22.8296	22.9634	23.403	NaN	NaN	NaN	NaN	NaN	18.694
MET	P08581	Hepatocyte growth factor receptor OS=Homo sapiens OX=9606 GN=MET PE=1 SV=4	[E]MVSNESVDYR	10	1xAbu-alpha (N-term) [N-Term]	9	3	2	0	1	2	0	0	22.5736	NaN	19.9809	21.8261	21.6823	22.1598	23.5729	23.8083	23.0934	NaN	19.3323	NaN	NaN	NaN	NaN
PUF60	A0A0J9YXX5	Poly(U)-binding-splicing factor PUF60 (Fragment) OS=Homo sapiens OX=9606 GN=PUF60 PE=1 SV=1	[M]GFGDPLSPLQSMAAQR	16	1xAbu-alpha (N-term) [N-Term]	24	3	2	0	2	1	0	0	NaN	NaN	NaN	NaN	23.6166	24.3217	23.7936	23.0329	23.37	21.7163	NaN	22.0033	19.3049	NaN	19.0654
MED1	Q15648	Mediator of RNA polymerase II transcription subunit 1 OS=Homo sapiens OX=9606 GN=MED1 PE=1 SV=4	[L]GVPMLGGDNGETK	13	1xAbu-alpha (N-term) [N-Term]	7	3	2	0	2	1	0	0	NaN	NaN	NaN	24.1197	24.3752	24.4187	22.8621	22.1381	NaN	NaN	NaN	NaN	NaN	NaN	NaN
PROCR	Q9UNN8	Endothelial protein C receptor OS=Homo sapiens OX=9606 GN=PROCR PE=1 SV=1	[C]SQDASDGLQR	10	1xAbu-alpha (N-term) [N-Term]	9	3	2	2	0	1	0	0	22.3801	22.1859	22.1094	18.4411	NaN	17.2354	21.0415	20.4848	21.5918	NaN	NaN	NaN	NaN	NaN	NaN
RPL36	Q9Y3U8	60S ribosomal protein L36 OS=Homo sapiens OX=9606 GN=RPL36 PE=1 SV=3	[M]ALRYPMAV	8	1xAbu-alpha (N-term) [N-Term]	5	3	2	2	0	1	0	0	19.6691	NaN	NaN	NaN	22.0686	21.4629	24.4217	24.6246	23.9679	21.5756	23.8204	22.6121	NaN	NaN	20.5788
CTTN	Q14247	Src substrate cortactin OS=Homo sapiens OX=9606 GN=CTTN PE=1 SV=2	[R]GFGGKFGVQMDR	12	1xAbu-alpha (N-term) [N-Term]	6	3	2	1	2	0	0	0	21.8808	20.9623	21.0099	22.7974	22.8828	22.9432	21.0575	20.228	NaN	NaN	NaN	NaN	NaN	NaN	NaN
GPKOW	Q92917	G-patch domain and KOW motifs-containing protein OS=Homo sapiens OX=9606 GN=GPKOW PE=1 SV=2	[Q]SVKPQEAPK	9	1xAbu-alpha (N-term) [N-Term]	4	3	2	1	2	0	0	0	22.386	21.9034	22.0343	21.7975	21.1713	20.9927	18.8334	20.0758	NaN	NaN	NaN	NaN	NaN	NaN	NaN
MAML1	Q92585	Mastermind-like protein 1 OS=Homo sapiens OX=9606 GN=MAML1 PE=1 SV=3	[P]GHASVSSLPTNSGQQDR	17	1xAbu-alpha (N-term) [N-Term]	6	3	2	1	2	0	0	0	23.2466	22.7553	22.8503	22.5252	22.6109	22.7374	23.5438	22.7219	23.4006	19.834	19.9833	20.1608	19.0536	20.6994	19.3336
KLF11	O14901	Krueppel-like factor 11 OS=Homo sapiens OX=9606 GN=KLF11 PE=1 SV=2	[-]MHTPDFAGPDDAR	13	1xAbu-alpha (N-term) [N-Term]	6	3	2	1	2	0	0	0	22.5627	22.083	22.0095	23.9664	23.8341	23.9762	NaN	NaN	NaN	NaN	NaN	NaN	NaN	NaN	NaN
PAPOLA	P51003	Poly(A) polymerase alpha OS=Homo sapiens OX=9606 GN=PAPOLA PE=1 SV=4	[N]AATSGNAATKIPTPIVGVK	19	1xAbu-alpha (N-term) [N-Term]	4	3	2	2	1	0	0	0	22.9127	22.2108	21.2426	20.9105	19.5347	21.7484	NaN	NaN	NaN	NaN	NaN	20.3843	NaN	NaN	NaN
HOMEZ	Q8IX15	Homeobox and leucine zipper protein Homez OS=Homo sapiens OX=9606 GN=HOMEZ PE=1 SV=2	[Q]GLRHNSVPGR	10	1xAbu-alpha (N-term) [N-Term]	7	3	2	2	1	0	0	0	22.228	21.0654	20.504	20.154	20.1589	20.7473	20.5763	21.0683	20.4046	NaN	NaN	24.5198	NaN	17.2872	17.6154
BTF3	P20290	Transcription factor BTF3 OS=Homo sapiens OX=9606 GN=BTF3 PE=1 SV=1	[L]GADSLTSLRR	10	1xAbu-alpha (N-term) [N-Term]	8	3	2	2	1	0	0	0	25.2858	24.7899	24.944	26.6744	26.5437	26.662	23.3227	24.2022	24.1752	NaN	NaN	NaN	NaN	NaN	NaN
EIF4H	Q15056	Eukaryotic translation initiation factor 4H OS=Homo sapiens OX=9606 GN=EIF4H PE=1 SV=5	[Q]VANPNSAIFGGARPR	15	1xAbu-alpha (N-term) [N-Term]	11	3	2	2	1	0	0	0	24.307	24.303	23.3374	22.6632	22.7745	22.7415	20.3653	20.2791	NaN	18.3566	21.8823	19.1757	NaN	19.6804	NaN
